1     **The International Space Station selects for microorganisms adapted to the extreme environment,**  
2             **but does not induce genomic and physiological changes relevant for human health**

3

4

5     Maximilian Mora<sup>1</sup>, Lisa Wink<sup>1</sup>, Ines Kögler<sup>1</sup>, Alexander Mahnert<sup>1</sup>, Petra Rettberg<sup>2</sup>, Petra Schwendner<sup>3</sup>,  
6         René Demets<sup>4</sup>, Charles Cockell<sup>3</sup>, Tatiana Alekhova<sup>5</sup>, Andreas Klingl<sup>6</sup>, Alina Alexandrova<sup>5</sup>, Christine  
7                             Moissl-Eichinger<sup>1,7,+</sup>

8

9

10

11     <sup>1</sup> Medical University of Graz, Department of Internal Medicine, Graz, Austria

12     <sup>2</sup> German Aerospace Center (DLR), Institute of Aerospace Medicine, Radiation Biology Department,  
13     Research Group Astrobiology, Cologne, Germany

14     <sup>3</sup> University of Edinburgh, School of Physics and Astronomy, Edinburgh, UK

15     <sup>4</sup> European Space Research and Technology Centre (ESTEC), Noordwijk, The Netherlands

16     <sup>5</sup> Lomonosov Moscow State University, Biological Faculty, Moscow, Russia

17     <sup>6</sup> Ludwig Maximilians University of Munich, Plant Development and Electron Microscopy,  
18     Department of Biology I, Biocenter, Planegg-Martinsried, Germany

19     <sup>7</sup> BioTechMed Graz, Austria

20

21     <sup>+</sup> Corresponding author. [christine.moissl-eichinger@medunigraz.at](mailto:christine.moissl-eichinger@medunigraz.at)

22

23     Keywords: International Space Station, ISS, microbiome, antibiotics resistance

24

25

26 Abstract

---

27 The International Space Station (ISS) is a unique, completely confined habitat for the human crew  
28 and co-inhabiting microorganisms. Here, we report on the results of the ISS experiment  
29 “EXTREMOPHILES”. We aimed to exploit the microbial information obtained from three surface and  
30 air sampling events aboard the International Space Station during increments 51 and 52 (2017) with  
31 respect to: i) microbial sources, diversity and distribution within the ISS, ii) functional capacity of  
32 microbiome and microbial isolates, iii) extremotolerance and antibiotics-resistance (compared to  
33 ground controls), and iv) microbial behavior towards ISS-relevant materials such as biofilm  
34 formation, or potential for degradation. We used wipe samples and analyzed them by amplicon and  
35 metagenomics sequencing, cultivation, comparative physiological studies, antibiotic resistance tests,  
36 genome analysis of isolates and co-incubation experiments with ISS-relevant materials. The major  
37 findings were: i) the ISS microbiome profile is highly similar to ground-based confined indoor  
38 environments, ii) the ISS microbiome is subject to fluctuations and indicative for the (functional)  
39 location, although a core microbiome was present over time and independent from location, iii) the  
40 ISS selects for microorganisms adapted to the extreme environment, but does not necessarily induce  
41 genomic and physiological changes which might be relevant for human health, iv) cleanrooms and  
42 cargo seems to be a minor source of microbial contamination aboard, and v) microorganisms can  
43 attach to and grow on ISS-relevant materials. Biofilm formation might be a threat for spacecraft  
44 materials with the potential to induce instrument malfunctioning with consequences for mission  
45 success. We conclude that our data do not raise direct reason for concern with respect to crew  
46 health, but indicate a potential threat towards biofilm formation and material integrity in moist  
47 areas.

48

49

50

51

52

## 53 Introduction

---

54 Human space exploration beyond boundaries of Earth and Moon is a declared goal of NASA, ESA,  
55 Roscosmos and other space-faring agencies, envisaging a potential human Mars mission in the next  
56 20 to 30 years. Maintenance of astronauts' health during a several hundred days journey in a  
57 confined artificial environment in space is one of the key aspects which has to be addressed for such  
58 a long-term mission.

59 The human immune system was shown to be compromised under space flight conditions, as a  
60 significant decrease of lymphocytes and also of the activity of innate and adaptive immune response  
61 was observed when compared to terrestrial controls (1,2). Adding an order of complexity, human  
62 health is strongly intertwined with its microbiome, billions of microorganisms thriving on external  
63 and internal surfaces of the human body.

64 Our body's microbiome is dependent on the environmental microbiome, as they are in constant  
65 exchange and interaction. Isolated human subjects in hospitals were observed to loose microbial  
66 diversity, serving as an indicator for health and stability in general (Koskinen 2019, unpublished); this  
67 might, however, be contradictory to observations on the astronauts' gut microbiome (3). The  
68 microbiome is prone to external factors, which influence the composition or the function of the  
69 microbial community. For instance, microbial diversity in built environments was shown to negatively  
70 correlate with the diversity of antimicrobial resistances especially in confined habitats in a recent  
71 publication (Mahnert et al, 2019, unpublished). With respect to space travel, it has been shown that  
72 microgravity affects the virulence of certain microorganisms, such as *Salmonella typhimurium* (4),  
73 *Listeria monocytogenes* and *Enterococcus faecalis* (5). As a consequence, monitoring of the microbial  
74 community aboard spacecraft is highly important to assess risk factors to the health of crew  
75 members.

76 Additionally, some microorganisms might even pose a risk to the material integrity of a spacecraft:  
77 So-called technophilic microorganisms, in particular fungi, are able to corrode alloys and polymers  
78 used in spacecraft assembly (6). Technophilic microorganisms caused major problems on the former  
79 Russian space station Mir (7,8).

80 The majority of information with respect to environmental microbiome dynamics aboard manned  
81 spacecraft is retrieved from ground-based simulation studies, such as the Mars500 (9) and the HI-  
82 SEAS (<http://hi-seas.org/>) experiments. However, the ISS is currently representing the most isolated  
83 human habitat.

84 The ISS circles our planet in low Earth orbit (approx. 400 km above ground) and is constantly  
85 inhabited since more than 18 years. Except for cargo exchange and the arrival of new crew members  
86 roughly every six months, the ISS is completely sealed off from any surrounding biological ecosystem  
87 and thus represents one of the most isolated and confined man-made environments to date (10).  
88 Like no other currently available testbed for long-term manned space missions, the ISS has the  
89 scientific benefit of providing real spaceflight conditions, including microgravity and an elevated  
90 background radiation - parameters, which are hard to implement in ground-based simulation studies.

91 The ISS consists of different modules, and while new modules were added over the years, also the  
92 crew size increased. Nowadays six international astronauts and cosmonauts routinely inhabit the ISS,  
93 along with their associated microorganisms. While certain microorganisms might benefit from the  
94 constant temperature (approx. 22°C) and stable humidity (approx. 60%) aboard the ISS,  
95 aforementioned harsh spaceflight conditions as well as low nutrient levels due to regular cleaning  
96 and a reduced introduction of new material, make the ISS for microorganisms a unique and extreme-  
97 situated indoor environment (11).

98 Recent publications focused on the microbial analysis of ISS debris and dust (12–15), the study of the  
99 astronauts' microbiome (16), the characterization of bacterial and fungal isolates from the ISS (17,18)  
100 and the (molecular) microbial analysis of swab and wipe samples taken inside the ISS (19). A study  
101 investigating the growth behavior of non-pathogenic (terrestrial) bacteria aboard the ISS found no  
102 changes in most bacteria, given that they have enough nutrients (11).

103 Other publications also focused on the detection of antimicrobial resistance genes aboard the ISS  
104 and evaluated the potential risk these genes might represent in a closed spacecraft environment  
105 (20). Singh et al. assessed the succession and persistence of microbial communities and the  
106 associated antimicrobial resistance and virulence properties based on metagenomic reads obtained  
107 from samples of three flights. Overall, 46 microbial species were found, including eight biorisk group  
108 2 species, to be persistent on the ISS over a timespan of roughly one and a half years (21). The  
109 authors inferred an increase of antimicrobial resistance and virulence genes over time bearing an  
110 alarming message that these factors seem to become an increasing proportion of the ISS  
111 microbiome.

112 Although an increased risk for the health of the astronauts and cosmonauts aboard has been  
113 proposed several times based on the molecular detection of antimicrobial resistances, viruses and  
114 pathogens, infections of crew members or health issues related to pathogenic action of  
115 microorganisms have been reported only rarely (22). Moreover, the given environmental microbial  
116 contamination limits (air, surfaces) were exceeded only in a few cases to date, in which appropriate

117 countermeasures succeeded in a timely manner (23). Moreover, a recent genomics-based study  
118 could not reveal potentially health-threatening differences in *Bacillus* and *Staphylococcus*  
119 pangenomes from ISS, compared to human-associated and soil pangenomes (24).

120 In this study, we report on the realization of the ISS experiment EXTREMOPHILES, targeting the  
121 profile, diversity, dynamics and functional capacity of the microbiome aboard. We used cultivation  
122 efforts to obtain microbial isolates. We assessed their genomic and physiological adaptation towards  
123 ISS conditions and tested the hypothesis, whether, as indicated by previous literature reports, ISS  
124 microorganisms possess a higher extemo-tolerance and antibiotics-resistance potential compared  
125 to ground controls. Moreover, we were interested in the surface-microbe interaction with regard to  
126 material integrity, exhibited by selected, freshly-isolated ISS strains.

127

128

129

130 Materials and Methods

131 **Pre-flight preparations and sampling aboard the ISS.** Packaging, pre-processing and logistics of the  
 132 sample material regarding upload and download from the ISS were managed by the Biotechnology  
 133 Space Support Center (BIOTESC) of the Lucerne University of Applied Sciences and Arts (Switzerland).  
 134 In-flight sampling aboard the ISS was performed during increment 51 and 52 (April to June 2017)  
 135 under the ESA (European Space Agency) operation named EXTREMOPHILES. Sampling was performed  
 136 either with dry wipes (session A and B) or pre-moistened wipes (session C; TX 3211 Alpha Wipe, ITW  
 137 Texwipe, Kernersville, US, 23x23 cm; 20 ml autoclaved ultra-pure water for chromatography,  
 138 LiChrosolv, Merck Millipore). Three sampling sessions were performed, with session A on 01.05.2017,  
 139 session B on 12.07.2017 and session C on 29.06.2017. With a span of 72 days between session A and  
 140 B they were conceptualized for comparative sampling to assess microbiome fluctuation over time. An  
 141 overview of all sampled areas and sessions is given in Table 1.

142 **Table 1: Sampling locations and sampling sessions.** In total, 24 wipes were retrieved from 5 different modules, and 15  
 143 different locations within the ISS.

| Wipe     | Sampled surface                                                                                              | ISS module              | Session |
|----------|--------------------------------------------------------------------------------------------------------------|-------------------------|---------|
| A-5, B-1 | Ambient air (field blank, FB)                                                                                | Columbus                | A, B    |
| A-4, B-2 | Light covers                                                                                                 |                         |         |
| A-2, B-3 | SSC laptop                                                                                                   |                         |         |
| A-3, B-4 | Hand grips                                                                                                   |                         |         |
| A-1, B-5 | Return grid sensor housing (RGSH)                                                                            |                         |         |
| A-6, B-6 | Sleeping Unit                                                                                                | Node 2<br>(Harmony)     | A       |
| A-7, B-7 | Panels (outer surface, close to the portable fire extinguisher (PFA) and portable breathing apparatus (PBA)) |                         |         |
| A-8, B-8 | Audio terminal unit (ATU)                                                                                    |                         |         |
| A-9      | Return Grid Sensor Housing (RGSH)                                                                            |                         |         |
| C-1      | Ambient air (field blank, FB)                                                                                | Cupola                  | C       |
| C-2      | Surface facing a window                                                                                      |                         |         |
| C-3      | Advanced resistive exercise device (ARED)                                                                    | Node 3<br>(Tranquility) |         |
| C-4      | Treadmill                                                                                                    |                         |         |
| C-5      | Waste and hygiene compartment (WHC): surfaces                                                                |                         |         |
| C-6      | Cover of the PBA, inside                                                                                     | Node 1 (Unity)          |         |
| C-7      | Dining table                                                                                                 |                         |         |

144

145 The sampling instructions for each session were as follows. 1: Put on sterile gloves (DNA-free nitrile  
 146 gloves, ABF Diagnostics GmbH, Kranzberg, Germany). 2: Using gloved hand, remove wipe X from bag  
 147 (metal closure bag, GML-alfaplast GmbH, Munich, Germany), wave wipe through the air (approx.  
 148 20s). Put wipe back into its bag and close properly. 3: Change glove. 4: Using gloved hand, take  
 149 sample using wipe Y according to Table 1. Put wipe back into its bag and close properly. 5: Repeat

150 steps 3 and 4 for every new sampling surface according to Table 1. 6: Store wipes at ambient (session  
151 A, B, dry wipes), or under cool conditions (“cold stowage”, 2-10°C, session C, moist wipes).

152 **Cleanroom and cargo vehicle sampling.** In order to retrieve samples for comparative analyses, one  
153 ISS-relevant cleanroom and cargo-spacecraft was sampled, namely cleanroom S5C at the Centre  
154 Spatial Guyanais near Kourou in French Guiana, housing ATV5 “Georges Lemaître”. Swab  
155 (FLOQSwabs™, Copan diagnostics, USA) and wipe samples from ATV and its cleanroom were  
156 provided by Stefanie Raffestin (ESA) in 2014.

157 **Sample extraction.** The obtained sample material was either available as wipes or swabs  
158 (cleanroom). Wipes were submerged in 80 ml DNA-free 0.9% (w/v) NaCl solution (NaCl was heat-  
159 treated to destroy DNA residues for 24 hours, 250°C), vortexed (10s) and shaken manually (15s),  
160 ultra-sonicated at 40 kHz for 2 min and vortexed (10s). The sampling material was aseptically  
161 removed from the extraction solution before cultivation- and molecular analyses. Swabs were  
162 submerged in 15 ml of NaCl solution and processed identically.

163 **Cultivation.** Cultivation of microorganisms was performed on a number of solid and liquid media, as  
164 given in Table 2. For microbial enrichment, we provided variable chemical and physical conditions  
165 with respect to: pH (pH 4-10), temperature (4-65°C), gas phase (aerobic, N<sub>2</sub>:H<sub>2</sub>:CO<sub>2</sub>, H<sub>2</sub>:CO<sub>2</sub>, N<sub>2</sub>:CO<sub>2</sub>),  
166 nutrients and nutrient availability. R2A (pH5-7), RAVAN and ROGOSA were supplemented with  
167 nystatin (50 µg/ml) to suppress growth of fungi; media targeting archaea were supplemented with 50  
168 µg/ml streptomycin and 100 µg/ml ampicillin. Inoculation was done using 500 and 250 µl (duplicates)  
169 of the extraction solution. In addition, 500 µl aliquots of the wipe suspension were irradiated at the  
170 DLR in Cologne, Germany, to select for radiation resistant isolates. They were either irradiated by UV-  
171 C (254nm) with an intensity of 50 J/m<sup>2</sup>, 75 J/m<sup>2</sup>, 100 J/m<sup>2</sup>, and 200 J/m<sup>2</sup> or by X-Rays with an  
172 intensity of 125 Gy, 250 Gy, 500 Gy, 750 Gy, or 1000 Gy. Radiation resistant microorganisms were  
173 cultivated on R2A and TSA agar. Pure cultures were obtained via repeated dilution series in liquid  
174 medium and/or purification streaks on solid media.

175

176 **Table 2: Cultivation conditions and media.**

| Medium                          | Abb.  | Target organisms | T [°C] | pH  | Phase  | Gas phase                                                  | Reference or manufacturer                                                  |
|---------------------------------|-------|------------------|--------|-----|--------|------------------------------------------------------------|----------------------------------------------------------------------------|
| R2A pH 4                        | R4    | Acidophiles      | 32     | 4   | Solid  | Aerobic (ambient)                                          | VWR Chemicals<br>BDH Prolabo®                                              |
| R2A pH 5                        | R5    | Acidotolerants   | 32     | 5   | Solid  | Aerobic (ambient)                                          |                                                                            |
| R2A pH 7                        | R7W   | Mesophiles       | 32     | 7   | Solid  | Aerobic (ambient)                                          |                                                                            |
|                                 | R7K   | Psychrophiles    | 4      | 7   | Solid  | Aerobic (ambient)                                          |                                                                            |
|                                 | R7A   | Anaerobes        | 32     | 7   | Solid  | N <sub>2</sub> :H <sub>2</sub> :CO <sub>2</sub> (80:10:10) |                                                                            |
| R2A pH 9                        | R9    | Alkalitolerants  | 32     | 9   | Solid  | Aerobic (ambient)                                          |                                                                            |
| R2A pH 10                       | R10   | Alkaliphiles     | 32     | 10  | Solid  | Aerobic (ambient)                                          |                                                                            |
| RAVAN                           | RAV   | Oligotrophs      | 32     | 7   | Solid  | Aerobic (ambient)                                          | (25) (1:100 modified)                                                      |
| Halo medium                     | HLO   | Halophiles       | 40     | 7.5 | Solid  | Aerobic (ambient)                                          | DSMZ medium 97 ( <a href="https://www.dsmz.de/">https://www.dsmz.de/</a> ) |
| Rogosa                          | ROG   | Lactobacilli     | 32     | 5.5 | Solid  | Aerobic (ambient)                                          | Merck                                                                      |
| Tryptic Soy Agar                | TSA   | Mesophiles       | 32     |     | Solid  | Aerobic (ambient)                                          | Becton Dickinson                                                           |
| Yeast-extract peptone medium    | YPD   | Yeasts & Fungi   | 32     | 7   | Solid  | Aerobic (ambient)                                          | Sigma-Aldrich                                                              |
| Potato dextrose agar            | PDA   | Yeasts & Fungi   | 25     | 5.6 | Solid  | Aerobic (ambient)                                          | Sigma-Aldrich                                                              |
| Autotrophic homoacetogen medium | AHM   | Homoacetogen     | 32     | 7   | Liquid | H <sub>2</sub> :CO <sub>2</sub> (20:80)                    | (26)                                                                       |
| Autotrophic allrounder medium   | AAM   | Autotrophs       | 32     | 7   | Liquid | N <sub>2</sub> :CO <sub>2</sub> (80:20)                    | (26)                                                                       |
| Archaea supporting medium       | ASM   | Archaea          | 32     | 7   | Liquid | H <sub>2</sub> :CO <sub>2</sub> (20:80)                    | (26)                                                                       |
| Medium for methanogens          | MS    | Methanogens      | 40     | 7   | Liquid | H <sub>2</sub> :CO <sub>2</sub> (20:80)                    | (27)                                                                       |
| MS+organics                     | MSO   | Methanogens      | 40     | 7   | Liquid | H <sub>2</sub> :CO <sub>2</sub> (20:80)                    | This study                                                                 |
| <i>N. exaquare</i> medium       | NEX   | Thaumarchaea     | 32     | 8.5 | Liquid | Aerobic (ambient)                                          | (28)                                                                       |
| Mixed ruminal bacteria medium   | MCB-3 | Methanogens      | 40     | 7   | Liquid | H <sub>2</sub> :CO <sub>2</sub> (20:80)                    | DSMZ medium322 ( <a href="https://www.dsmz.de/">https://www.dsmz.de/</a> ) |
| R2A pH 7 liquid                 | R2A   | Thermophiles     | 65     | 7   | Liquid | Aerobic (ambient)                                          | This study                                                                 |

177

178 **16S rRNA gene sequencing and classification of the bacterial and fungal isolates.** Partial 16S rRNA  
 179 genes of the isolates were amplified using the primers 9bF (5'-GRGTTTGATCCTGGCTCAG-3') and  
 180 1406uR (5'-ACGGGCGGTGTGTRCAA-3'), applying the following cycling conditions: Initial denaturation  
 181 at 95°C for 2min, followed by 10 cycles of denaturing at 96°C for 30s, annealing at 60°C for 30s and  
 182 elongation at 72°C for 60s, followed by another 22 cycles of denaturing at 94°C for 30s, annealing at  
 183 60°C for 30s and elongation at 72°C for 60s, and a final elongation step at 72°C for 10min (29). The  
 184 template was either a small fraction of a picked colony in a colony-PCR assay or 5–20ng of DNA  
 185 purified from culture via the peqGOLD Bacterial DNA Kit (Peqlab, Germany). The 16S rRNA gene  
 186 amplicons were visualized on a 1.5% agarose gel, purified with the Min Elute PCR Purification Kit



187 (Qiagen, Netherlands) or the Monarch PCR and DNA Cleanup Kit (New England Biolabs, US). After  
188 Sanger-sequencing (Eurofins, Germany) the obtained sequences were classified using the EzBioCloud  
189 platform at <http://www.ezbiocloud.net/eztaxon> (30).

190 The ITS region of fungal isolates was sequenced using the primers ITS1F (5'-  
191 CTTGGTCATTAGAGGAAGTAA-3') and ITS4 (5'-TCCTCCGCTTATTGATATGC-3') and following cycling  
192 conditions: initial denaturation at 95°C for 10min, followed by 35 cycles of denaturing at 94°C for 60s,  
193 annealing at 51°C for 60s, elongation at 72°C for 60s, and a final elongation step at 72°C for 8min.  
194 The amplicons were Sanger-sequenced (Eurofins, Germany) and the obtained sequence was  
195 classified using the curated databases UNITE version 7.2 (31) and BOLD version 4 (32). Fungal isolates  
196 of session A, B, and C were classified according to phenotypical characteristics

197 **Phylogenetic tree reconstruction.** For phylogenetic tree reconstruction, the forward and reverse  
198 sequences obtained from the isolates were merged to reach a minimum sequence length of 1000 bp.  
199 The phylogenetic tree was calculated with the Fast Tree programme (33) and displayed with the  
200 Interactive Tree of Life online tool iTOL (34).

201 **DNA extraction of ISS wipe samples.** After aliquots were removed for cultivation assays, the rest of  
202 the wipe solutions were filled into Amicon Ultra-15 filter tubes (Sigma Aldrich) and were centrifuged  
203 at 4000x g for 10-30 min at 4°C. The flow-through was discarded and the remaining liquid in the  
204 filters was pipetted into 1.5ml Eppendorf tubes for DNA extraction with the modified XS- buffer  
205 method as previously described (35). DNA concentrations were determined using Qubit (Life  
206 Technologies, US).

207 **Microbial profiling using next- generation sequencing methods.** To investigate the detectable  
208 molecular diversity, we used a “universal” and an Archaea-targeting approach. The 16S rRNA gene  
209 amplicons for the universal approach were amplified using Illumina-tagged primers F515 (5'-  
210 TCGTCGG-CAGCGTCAGATGTGTATAAGAGACAGGTGCCAGCMGCCGCGGTAA-3') and R806 (5'-  
211 GTCTCGTGGGCTCGGAGATGTGTATAAGAGACAGGGAC-TACHVGGGTWTCTAA3') (36). Archaeal  
212 amplicons were obtained by a nested approach (37): First, a ~550 bp-long 16S rRNA gene amplicon  
213 was generated with the primers Arch344F (5'-ACGGGGYGCAGCAGGCGCGA-3') and Arch915R (5'-  
214 GTGCTCCCCGCCAATTCCT-3') (38,39) and in a second PCR, the amplicons for Illumina sequencing  
215 were generated by the tagged primers Arch519F (5'-  
216 TCGTCGGCAGCGTCAGATGTGTATAAGAGACAGCAGCMGCCGCGGTAA-3') and Arch785R (5'-  
217 GTCTCGTGGGCTCGGAGATGTGTATAAGAGACAGGACTACHVGGGTATCTAATCC-3') (40), using the  
218 purified product of the first PCR as template. The cycling conditions for the universal approach were  
219 initial denaturation at 94°C for 3 min, followed by 35 cycles of denaturing at 94°C for 45s, annealing

220 at 60°C for 60s and elongation at 72°C for 90s, followed by a final elongation step at 72°C for 10 min.  
221 For the first PCR of the nested archaeal approach, the cycling conditions were initial denaturation at  
222 95°C for 2 min, followed by 10 cycles of denaturing at 96°C for 30s, annealing at 60°C for 30s, and  
223 elongation at 72°C for 60s, followed by another 15 cycles of denaturing at 94°C for 30s, annealing at  
224 60°C for 30s, and elongation at 72°C for 60s, and a final elongation step at 72°C for 10min. For the  
225 second amplification the cycling conditions were initial denaturation at 95°C for 5 min, followed by  
226 25 cycles of denaturing at 95°C for 40s, annealing at 63°C for 120s and elongation at 72°C for 60s,  
227 followed by a final elongation step at 72°C for 10 min.

228 **Genome sequencing, genome reconstruction and annotation of selected isolates.** We sequenced  
229 the genomic DNA of six isolates obtained from ISS samples described earlier (41). DNA was isolated  
230 from overnight cultures using the peqGOLD bacterial DNA mini kit (Peqlab, Germany). Double  
231 stranded DNA was quantified via Qubit Fluorometer 2.0 (Invitrogen, USA) according to  
232 manufacturer's instructions. Library preparation and sequencing was carried out at the Core Facility  
233 Molecular Biology at the Center for Medical Research at the Medical University Graz, Austria.

234 Genomic reads were quality checked with FastQC (42) and then filtered with Trimmomatic (removed  
235 all adapter sequences, SLIDINGWINDOW 4:20, MINLEN 50)(43). Genomes were assembled with  
236 SPADES in careful mode (44) and afterwards checked for completeness via CheckM (45). The  
237 assemblies were annotated and compared to closely related reference strains via the microbial  
238 genome annotation & analysis platform MicroScope (<http://www.genoscope.cns.fr/agc/microscope>)  
239 (46–48).

240 **Resistance and physiological tests.** Experiments were performed with selected microbial isolates  
241 from this and our recent study on ISS microorganisms (14). (i) **Heat- shock resistance test:** The heat-  
242 shock test was carried out according to ESA standards (49). In brief, single colonies of 3–5-day old  
243 cultures were suspended in two test tubes containing 2.5 ml sterile PBS. One tube was incubated at  
244 room temperature (control), whereas the other was placed in a water bath and exposed for 15 min  
245 to 80°C. Samples were immediately cooled down on ice for 5 min after incubation time. The  
246 temperature was monitored using a separate pilot tube containing 2.5 ml PBS. Afterwards, 0.5 ml of  
247 the heat-shocked suspension and 0.5 ml of the room temperature suspension were plated and  
248 incubated at 32°C for 72h. (ii) **Physiological tests:** For the assessment of the temperature range,  
249 cultures were plated on R2A pH7 agar and incubated overnight at 32°C. Then the incubation  
250 temperatures for the species still growing were stepwise decreased and increased until no further  
251 growth was observed. Limits of pH tolerance were assessed accordingly. (iii) **Antibiotics susceptibility**  
252 **tests:** Antimicrobial susceptibility testing for selected, clinically relevant antibiotics (Table 3) was  
253 performed using Etest® reagent strips (Biomérieux, Germany) according to manufacturer's

254 instruction and detailed in (14). Since there were no species-specific breakpoints available, MICs  
 255 were interpreted according to EUCAST guideline table “PK/PD (Non-species related) breakpoints”  
 256 (50). In brief, overnight cultures (2–3-day cultures for slower-growing bacteria) were suspended in  
 257 0.9% saline. 100 µl of this suspension was plated on standardized Müller-Hinton agar for  
 258 antimicrobial susceptibility testing (Becton Dickinson, USA). Etest® reagent strips were placed on the  
 259 plates followed by aerobic incubation for 24 h at 34°C.

260 **Table 3: Antibiotics used for antimicrobial susceptibility tests, see also (14).**

| Antibiotic substance              | Type                                                         | Mechanism of action/target                        | Target group | Concentrations applied (µg/ml) |
|-----------------------------------|--------------------------------------------------------------|---------------------------------------------------|--------------|--------------------------------|
| Amoxicillin/<br>clavulanic acid   | β- Lactam antibiotic (penicillin) and β- lactamase inhibitor | Inhibits cell wall synthesis; bactericidal        | Gram + /-    | 0.016- 256                     |
| Ampicillin                        | β- Lactam antibiotic (penicillin)                            | Inhibits cell wall synthesis; bactericidal        | Gram + /-    | 0.016- 256                     |
| Cefotaxime                        | β- Lactam antibiotic (cephalosporin)                         | Inhibits cell wall synthesis; bactericidal        | Gram + /-    | 0.016– 32                      |
| Ceftriaxone                       | β- Lactam antibiotic; (cephalosporin)                        | Inhibits cell wall synthesis; bactericidal        | Gram + /-    | 0.016– 256                     |
| Ciprofloxacin                     | Fluoroquinolone                                              | Inhibits bacterial DNA gyrase; bactericidal       | Gram + /-    | 0.002– 32                      |
| Clarithromycin                    | Macrolide                                                    | Inhibits protein synthesis; bacteriostatic        | Gram + /-    | 0.016– 256                     |
| Clindamycin                       | Lincosamide                                                  | Inhibits protein synthesis; bacteriostatic        | Gram + /-    | 0.016– 256                     |
| Colistin                          | Polypeptide antibiotic; polymyxin                            | Attacks cell membrane; bactericidal               | Gram -       | 0.016– 256                     |
| Doxycycline                       | Polyketide antibiotic; (tetracycline)                        | Inhibits protein synthesis; bacteriostatic        | Gram + /-    | 0.016– 256                     |
| Gentamicin                        | Aminoglycoside                                               | Inhibits protein synthesis; bactericidal          | Gram + /-    | 0.016– 256                     |
| Levofloxacin                      | Fluoroquinolone                                              | Inhibits bacterial DNA gyrase; bactericidal       | Gram + /-    | 0.002– 32                      |
| Linezolid                         | Oxazolidinone                                                | Inhibits protein synthesis; bacteriostatic        | Gram +       | 0.016– 256                     |
| Meropenem                         | β- Lactam antibiotic (carbapenem)                            | Inhibits cell wall synthesis; bactericidal        | Gram + /-    | 0.002– 32                      |
| Moxifloxacin                      | Fluoroquinolone                                              | Inhibits bacterial DNA gyrase; bactericidal       | Gram + /-    | 0.002– 32                      |
| Penicillin G                      | β- Lactam antibiotic (penicillin)                            | Inhibits cell wall synthesis; bactericidal        | Gram+        | 0.016– 256                     |
| Trimethoprim/sul<br>famethoxazole | Dihydrofolate reductase inhibitor and sulfonamide            | Inhibits tetrahydrofolate synthesis; bactericidal | Gram + /-    | 0.002– 32                      |
| Vancomycin                        | Glycopeptide antibiotic                                      | Inhibits cell wall synthesis; bactericidal        | Gram+        | 0.016– 256                     |

261

262 **Co-incubation experiments and electron microscopy.** To test if some of our isolates interact with,  
 263 and possibly damage, materials used aboard the ISS, we incubated them together with relevant ISS

264 material. Pieces of NOMEX® fabric were provided by the Biotechnology Space Support Center  
265 (BIOTESC) of the Lucerne University and plates of the aluminum copper magnesium alloy EN AW  
266 2219 which is also used on the ISS, were provided by Thales Alenia Space (TAS), Italy. NOMEX® is a  
267 flexible, flameproof fabric used for most storage bags aboard the ISS. The NOMEX® fabric was cut  
268 into pieces of 20 mm x 30 mm and autoclaved before incubation. The aluminum alloy EN AW 2219  
269 was cut into small plates of 20 mm x 30 mm x 3 mm by Josef Baumann in Falkenberg, Germany, and  
270 then evenly polished with a grit size of P240 and partly eloxated by Heuberger Eloxal, Austria. The  
271 autoclaved metal platelets, non-eloxated and eloxated, and NOMEX® fabric pieces were then  
272 incubated together with bacteria isolated from the ISS: *Cupriavidus metallidurans* pH5\_R2\_1\_II\_A  
273 (aerobic), *Bacillus licheniformis* R2A\_5R\_0.5 (aerobic), and *Cutibacterium avidum* R7A\_A1\_IIIA  
274 (anaerobic). Incubations were done in triplicates over a period of 3 months in liquid R2A medium in  
275 Hungate tubes at pH7 and 32°C. Every 2 weeks, 50% of the medium was exchanged to ensure  
276 survival and further growth of the bacteria. After incubation, metal plates and NOMEX® fabric pieces  
277 were investigated via scanning electron microscopy. Metal plates and NOMEX® fabric pieces from  
278 the co-incubation experiment with selected bacteria were aseptically removed from their respective  
279 Hungate tube, carefully rinsed with 1xPBS buffer and then fixated overnight in a 100 mM sodium  
280 cacodylate buffer containing 2.5 % (v/v) glutaraldehyde at 4°C. Scanning electron microscopy of the  
281 samples was performed at the Biocenter of the Ludwig-Maximilians-University Munich using a Zeiss  
282 Auriga cross beam unit (Zeiss, Oberkochen, Germany).

283 **Amplicon sequencing:** Library preparation and sequencing were carried out at the Core Facility  
284 Molecular Biology at the Center for Medical Research at the Medical University Graz, Austria. In brief,  
285 DNA concentrations were normalized using a SequalPrep™ normalization plate (Invitrogen), and each  
286 sample was indexed with a unique barcode sequence (8 cycles index PCR). After pooling of the  
287 indexed samples, a gel cut was carried out to purify the products of the index PCR. Sequencing was  
288 performed using the Illumina MiSeq device and MS-102-3003 MiSeq® Reagent Kit v3-600cycles  
289 (2x251 cycles).

290 **Sequence data processing and analysis:** Demultiplexed, paired reads were processed in R (version  
291 3.2.2) using the R package DADA2 as described in (51). In brief, sequences were quality checked,  
292 filtered, and trimmed to a consistent length of ~270 bp (universal primer set) and ~140 bp (archaeal  
293 primer set). The trimming and filtering were performed on paired end reads with a maximum of two  
294 expected errors per read (maxEE = 2). Passed sequences were de-replicated and subjected to the  
295 DADA2 algorithm to identify indel-mutations and substitutions. The DADA2 output table is not based  
296 on a clustering step and thus no operational taxonomic units (OTUs) were generated. Each row in the  
297 DADA2 output table corresponds to a non-chimeric inferred sample sequence, each with a separate

298 taxonomic classification (ribosomal sequence variants; RSVs) (51). In addition, the merging step  
299 occurs after denoising, which increases accuracy. After merging paired end reads and chimera  
300 filtering, taxonomy was assigned with the RDP classifier and the SILVA v.123 trainset (52). The  
301 visualization was carried out using the online software suite “Calypso” (53). For bar plots data was  
302 normalized by total sum normalization (TSS) and for PCoA and Shannon index by TSS combined with  
303 square root transformation. Tax4fun was performed based on the Silva-classified OTU table, as  
304 described (54).

### 305 **RSV Network**

306 G-test for independence and edge weights were calculated on the RSV table using the  
307 `make_otu_network.py` script in QIIME 1.9.1 (55). The network table with calculated statistics was  
308 then imported into Cytoscape 3.7.1 (56) and visualized as a bipartite network of sample (hexagons)  
309 and RSV nodes (circles) connected by edges. For clustering, a stochastic spring-embedded algorithm  
310 based on the calculated edge weights was used. Size, transparency and labels were correlated with  
311 RSV abundances, border line intensity refers to RSV persistence over multiple sampling sessions and  
312 edge transparency was correlated to calculated edge weights.

313 **Shotgun metagenomics.** Shotgun libraries for Illumina MiSeq sequencing were prepared with the  
314 NEBNext® Ultra II DNA Library Prep Kit for Illumina® in combination with the Index Primer Set 1 (NEB,  
315 Frankfurt, Germany) according to manufacturer’s instructions and as described in (57). Briefly, 500 ng  
316 of dsDNA were randomly fragmented by ultrasonication in a microTUBE on a M220 Focused-  
317 ultrasonicator™ (Covaris, USA) in a total volume of 130 µl 1xTE for 80 seconds with 200 cycles per  
318 burst (140 peak incident power, 10% duty factor). After shearing, 200 ng of sheared DNA were used  
319 for the end repair and adapter ligation reactions in the NEBNext® Ultra II DNA Library Prep Kit for  
320 Illumina® according to manufacturer’s instructions. Size selection and purification were performed  
321 according to the instructions for 300 to 400bp insert size. Subsequent PCR amplification was  
322 performed with 4 cycles and libraries were eluted after successful amplification and purification in 33  
323 µl 1xTE buffer pH 8.0. For quality control libraries were analyzed with a DNA High Sensitivity Kit on a  
324 2100 Bioanalyzer system (Agilent Technologies, USA) and again quantified on a Quantus™  
325 Fluorometer (Promega, Germany). An equimolar pool was sequenced on an Illumina MiSeq desktop  
326 sequencer (Illumina, CA, USA). Libraries were diluted to 8 pM and run with 5% PhiX and v3 600 cycles  
327 chemistry according to manufacturer’s instructions. Raw fastq data files were uploaded to the  
328 metagenomics analysis server (MG-RAST) (58) and processed with default parameters. Annotations  
329 of taxonomy (RefSeq) and functions (Subsystems) were then imported to QIIME 2 (2018.11) (59) or  
330 Calypso (53) to calculate core features, alpha and beta diversity metrics, statistics and additional  
331 visualizations of the datasets.

332 **Controls.** Cultivation, extraction, PCR, and sequencing controls were processed and analysed in  
333 parallel to biological samples. An unused wipe not taken out of its bag on the ISS was extracted for  
334 every sampling session, cut into pieces, placed on the different media and DNA was also extracted  
335 from the solutions obtained with the negative controls. All cultivation controls were negative (no  
336 growth of colonies). Wipe solutions of the negative controls used for DNA extraction, PCR, and  
337 sequencing revealed a low number of ribosomal sequence variants. These RSVs were removed from  
338 according datasets, if present in the samples.

339 **Data availability.** Data are available on request.

340

341

## 342 **Results**

---

343 In-flight sampling on board the ISS was performed during increment 51 and 52 (April to June 2017)  
344 under the ESA operation named EXTREMOPHILES. All samples (n=24, plus controls) were taken by US  
345 astronaut Jack D. Fischer. Three sampling sessions were performed, with session A on 01.05.2017,  
346 session B on 12.07.2017 and session C on 29.06.2017. With a span of 72 days between session A and  
347 B they were conceptualized for time-course sampling (same sampling locations) to get an idea on the  
348 microbiome fluctuation. For comparative purposes, an ISS-relevant cleanroom and a therein housed  
349 cargo-spacecraft were sampled, namely cleanroom S5C at the Centre Spatial Guyanais near Kourou  
350 in French Guiana with ATV spacecraft.

351

### 352 **ISS microbiome is dominated by human-associated microorganisms and contains also archaeal** 353 **signatures.**

354 The microbial community composition was assessed by amplicon sequence analysis of wipe samples  
355 obtained from sessions A-C and the Kourou cleanroom. After complete removal of RSVs from  
356 negative controls, more than 3.500 RSVs remained from all ISS and cleanroom samples for the  
357 analysis. Both, archaeal and bacterial signatures were retrieved from ISS samples with the universal  
358 approach (Fig 1). The signatures belonged to 377 genera, with *Streptococcus*, *Corynebacterium*,  
359 *Lactobacillus*, *Acinetobacter*, *Staphylococcus* predominating (Fig. 1). Firmicutes, Proteobacteria,  
360 Actinobacteria and Bacteroidetes were found to be the predominant bacterial phyla (all samples),  
361 whereas archaeal signatures (Woesearchaeota, Thaumarchaeota, Euryarchaeota) were frequently  
362 detected in air (Cupola air 14.1% and Columbus air session B 3.6% of all sequences) and on various  
363 surfaces (Fig. 1). By the archaea-targeting approach, mostly gut associated *Methanobrevibacter*  
364 sequences (surface Cupola [sample C2], waste and hygiene compartment [C5]), Woesearchaeota  
365 (ATU [A8, B8]; hand grips Columbus [B4]), and unclassified Archaea (ATU [A8], dining table [C7]) were  
366 detected. To a lesser extent we also found signatures from Halobacteria (SSC Laptop Columbus [A2])  
367 and Thaumarchaeota (dining table [C7]).

368 The cleanroom samples, which were analyzed for comparison, showed a different microbial signature  
369 profile, with a predominance of alpha-proteobacterial genera (*Sphingomonas*, *Novosphingobium*,  
370 *Methylobacterium*).

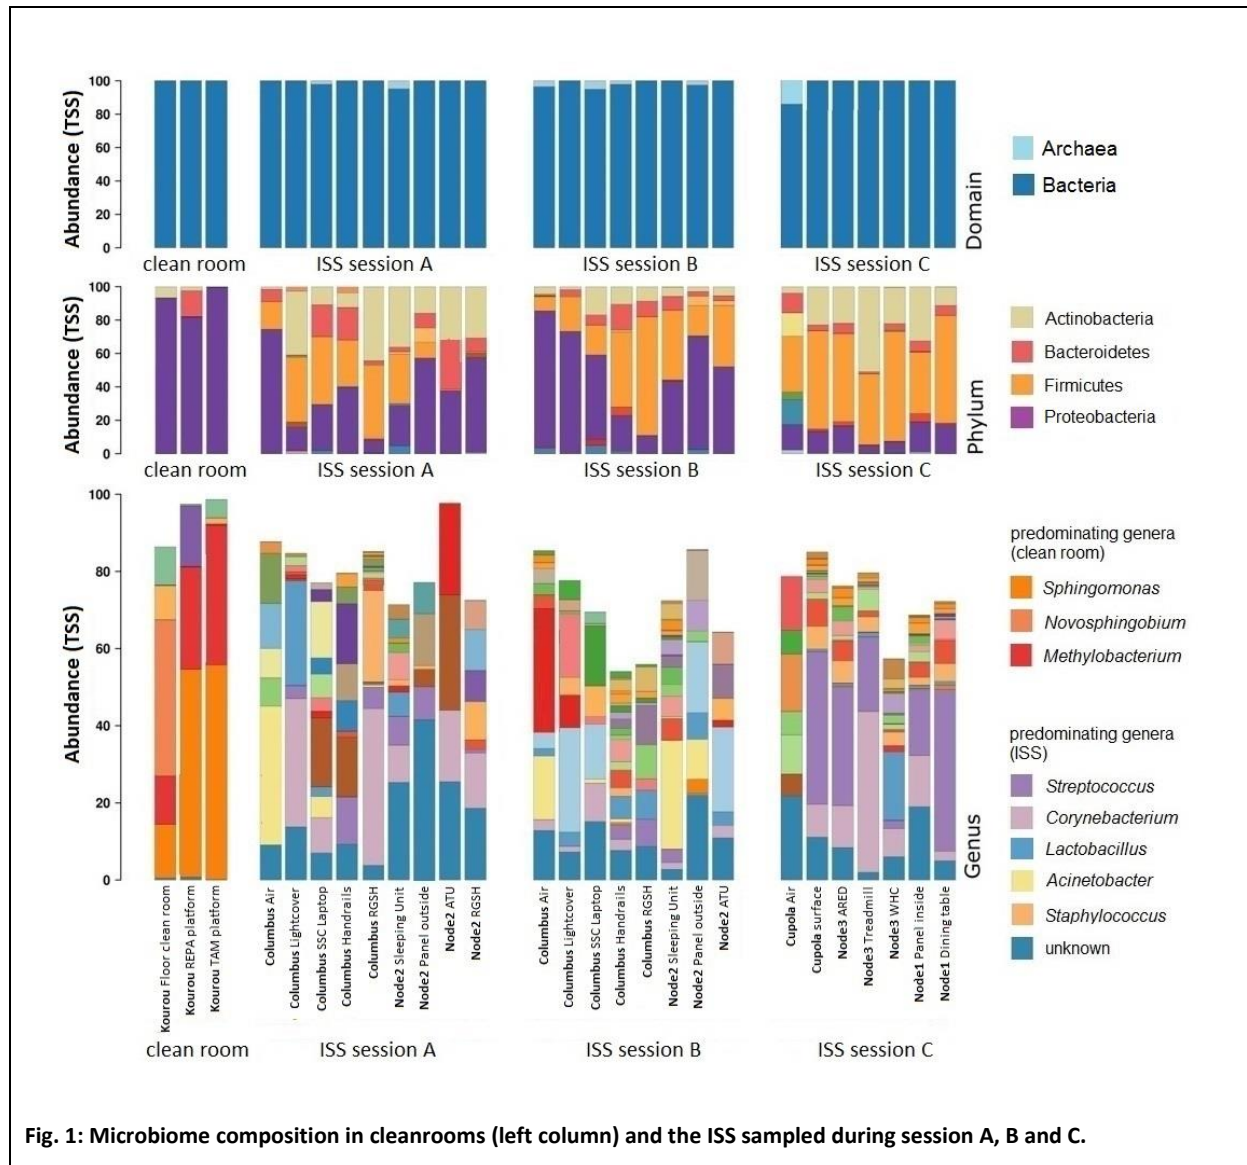

374 **Microbiome dynamics (comparison of session A and B).** To retrieve insights into the microbiome  
 375 dynamics over time, session A and B were conceptualized with a time-lapse of 72 days between the  
 376 two samplings. During the complete sampling timeframe, no crew exchange took place, but two  
 377 cargo deliveries docked (SpaceX and Soyuz). Notably, the microbial diversity (RSVs) were found to be  
 378 increased significantly in samples of session B ( $p=0.034$ , ANOVA; Inverse Simpson's, rarefied to a  
 379 depth of 649 RSVs; Fig. 2a), however, the evenness of samples did not change significantly ( $p=0.68$ ,  
 380 ANOVA). Anosim analysis indicated a significantly different composition of the samples taken in  
 381 session A and B ( $p=0.001$ ). LEfSe analysis (targeting the 300 most abundant genera) identified a  
 382 substantial increase of signatures belonging to typically gastrointestinal tract-associated genera  
 383 *Escherichia/Shigella* ( $p=0.017$ , ANOVA), *Lachnoclostridium*, *Ruminococcus\_2* ( $p=0.046$ ) and



384 *Pseudobutyrvibrio* towards session B, whereas members of *Cloacibacterium* ( $p=0.027$ ) and  
 385 unclassified Corynebacteriaceae ( $p=0.02$ ) were significantly reduced.

386 Significant changes on RSV level are given in Fig. 2b, with an overall notable increase of a certain RSV  
 387 of *Ralstonia* in samples of session B. Pie charts were created from single locations within the ISS to  
 388 visualize the changes in microbiome composition (Fig. 2c). It shall be noted, that signatures of  
 389 unclassified Woesearchaeota (DHVEG6) were found amongst the 40 most abundant microbial genera  
 390 (additional details below).

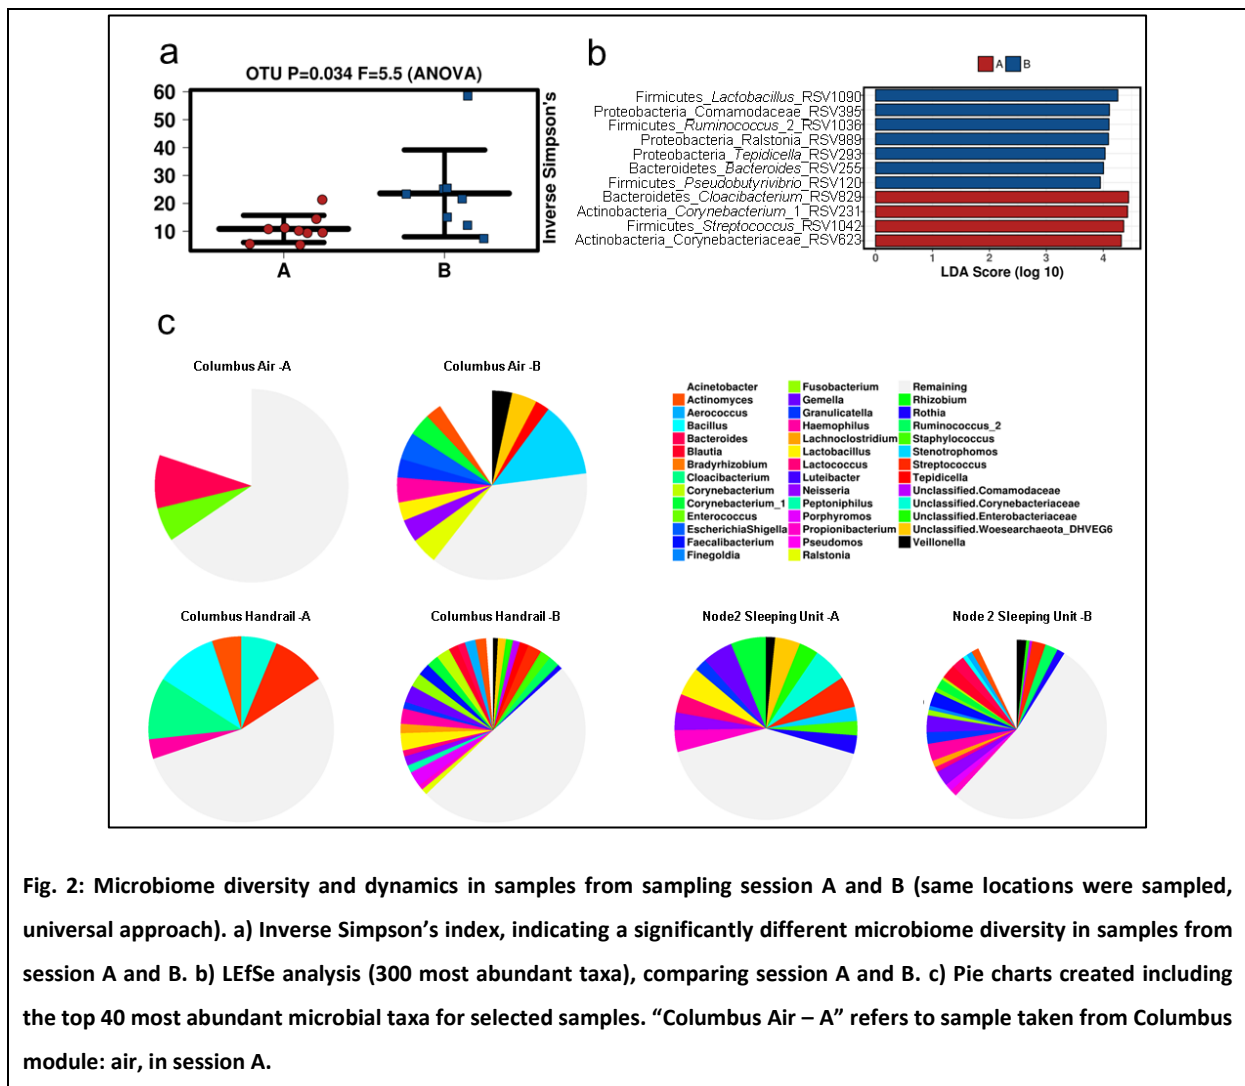

391  
 392 **Fig. 2: Microbiome diversity and dynamics in samples from sampling session A and B (same locations were sampled,**  
 393 **universal approach). a) Inverse Simpson's index, indicating a significantly different microbiome diversity in samples from**  
 394 **session A and B. b) LefSe analysis (300 most abundant taxa), comparing session A and B. c) Pie charts created including**  
 395 **the top 40 most abundant microbial taxa for selected samples. "Columbus Air – A" refers to sample taken from Columbus**  
 396 **module: air, in session A.**

397  
 398 **The ISS harbors a core microbiome of more than 50 microbial genera.**  
 399 Core microbiome analyses, looking at the 100 most abundant RSVs, identified 34 taxa shared  
 400 amongst all sampling time points (A-C, minimal relative abundance: 10%), whereas 55 taxa were  
 401 shared on genus level. The most abundant, shared RSVs belonged to the microbial genera  
 402 *Haemophilus*, *Gemella*, *Streptococcus*, *Corynebacterium*, *Staphylococcus*, *Lactococcus*, *Neisseria* and

403 *Fingoldia*. 31 taxa were shared amongst all modules. To obtain a better overview on the  
404 biogeography of the ISS microbiome, a network was calculated (Fig. 3).

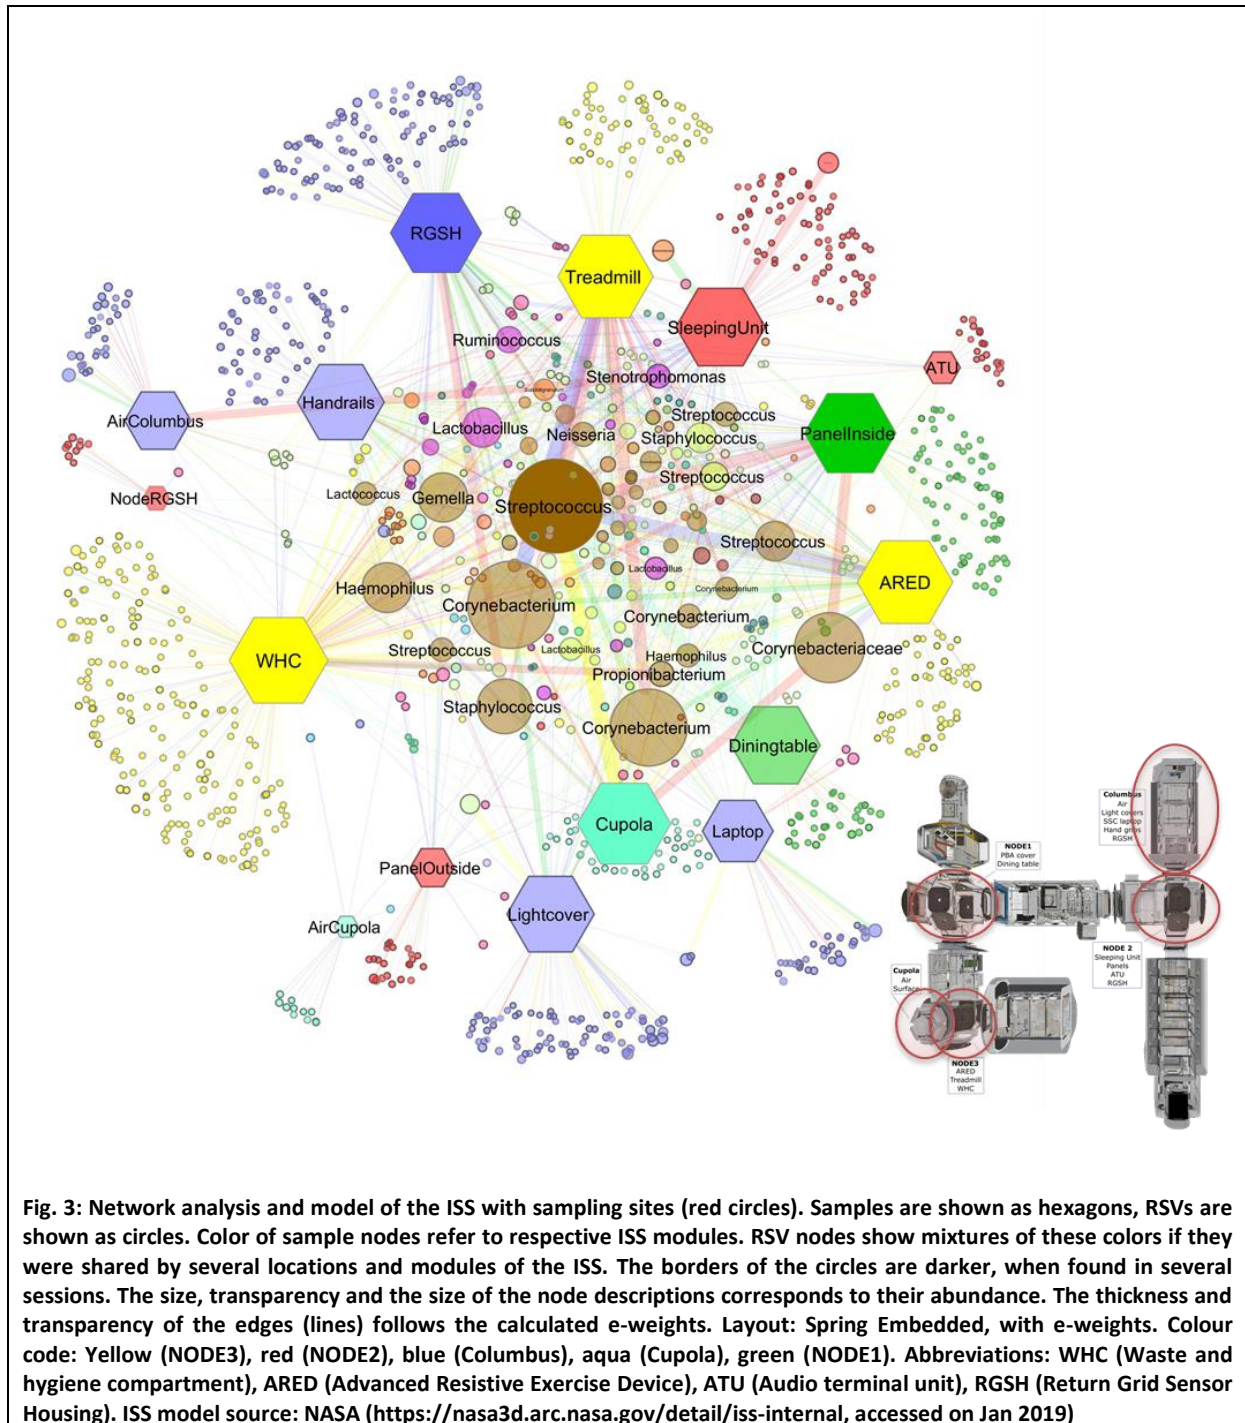

414 The network analysis showed a higher abundance for RSVs which belong to the core ISS microbiome  
415 (e.g. *Streptococcus*, *Corynebacterium*, *Staphylococcus*, *Haemophilus*, *Gemella* or *Propionibacterium*).

416 Notably, most location-specific RSVs were observed for WHC (waste and hygiene compartment) and  
417 RGS (return grid sensor housing). This was expected for the WHC area (as hygienic activities shed  
418 (internal) human microorganisms into the environment), but surprising for the RGS. The RGS is

419 the air inlet part of the air recycling system, expected to accumulate biological burden from the  
420 environment, but not to host indigenous microbiology.

421 Locations with regular crew activity (e.g. treadmill, sleeping unit, handrails) showed higher  
422 proportions of RSVs assigned to the human-associated genera *Stenotrophomonas*, *Ruminococcus* and  
423 *Lactobacillus*. When clustering the samples according to their origin, the network also indicated that  
424 locations exposed to high human traffic from different modules are more similar to each other than  
425 samples of high and low human traffic which were taken within the same ISS module.

426

### 427 Location shapes microbiome composition

428 In a next analyses step, we were interested in external parameters influencing the ISS microbiome.  
429 Redundancy analysis indicated a significant effect of the time of sampling (sessions;  $p=0.010$ ), and  
430 indicated a potential effect of the location within the ISS (module;  $p=0.054$ ) on microbiome  
431 composition. We further categorized the different samples into: air, personal area (sleeping unit),  
432 shared areas which are highly frequented (e.g. communication items, handrails), and shared areas  
433 which are less often touched (e.g. lightcover, RGSH, etc.). An NMDS plot performed on RSV level  
434 indicated a different composition of the microbiome according to these categories, whereas shared  
435 surfaces showed an overlap no matter whether they were frequently or less frequently touched.  
436 However, this grouping was not confirmed by statistical analyses ( $p=0.364$ , Anosim based on Bray-  
437 Curtis distance metric). The highest diversity of microbial signatures was detected in personal areas  
438 of the ISS, without being significantly different.

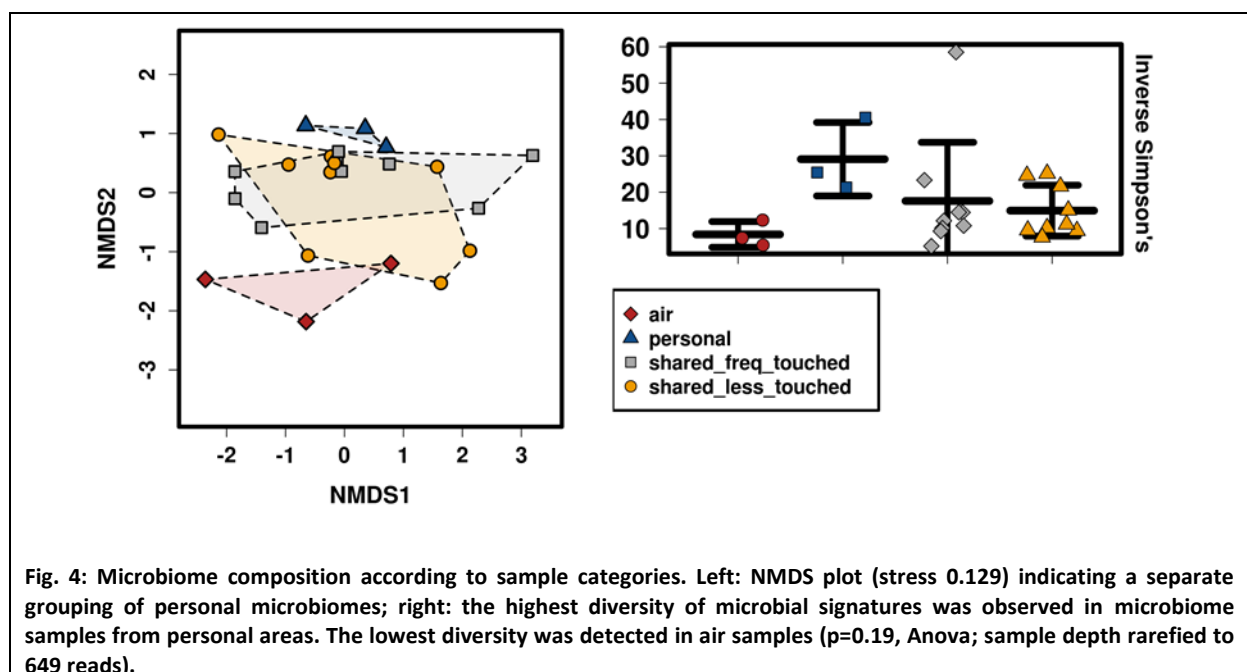

444 ANOVA plot analysis indicated e.g. the increased presence of human-associated *Streptococcus* RSVs  
 445 in samples from dining table and workout area, *Neisseria* species (human mucosa-associated  
 446 microorganisms) were particularly detected in the sleeping unit and work out area. *Lactococcus*  
 447 signatures were particularly found in samples from the dining table (potentially food-associated), the  
 448 sleeping unit and the workout area, whereas RSVs from *Actinomyces*, *Enterococcus*, *Lautropia* and  
 449 *Brevibacterium* were significantly enriched on handrails, in air, on the dining table, and in the work  
 450 out area, respectively (all p-values < 0.05, see Fig. 5). The waste and hygiene area showed  
 451 significantly increased abundances of RSVs belonging to *Lactobacillus*, *Propionibacterium*, *Collinsella*,  
 452 *Subdoligranulum*, *Romboutsia* and *Anaerostipes* (Fig. 5). All in all, the samples retrieved from the ISS  
 453 were largely reflecting the human microbiome, as other sources of the microbial signatures could not  
 454 be identified (besides potentially food for *Lactococcus*).

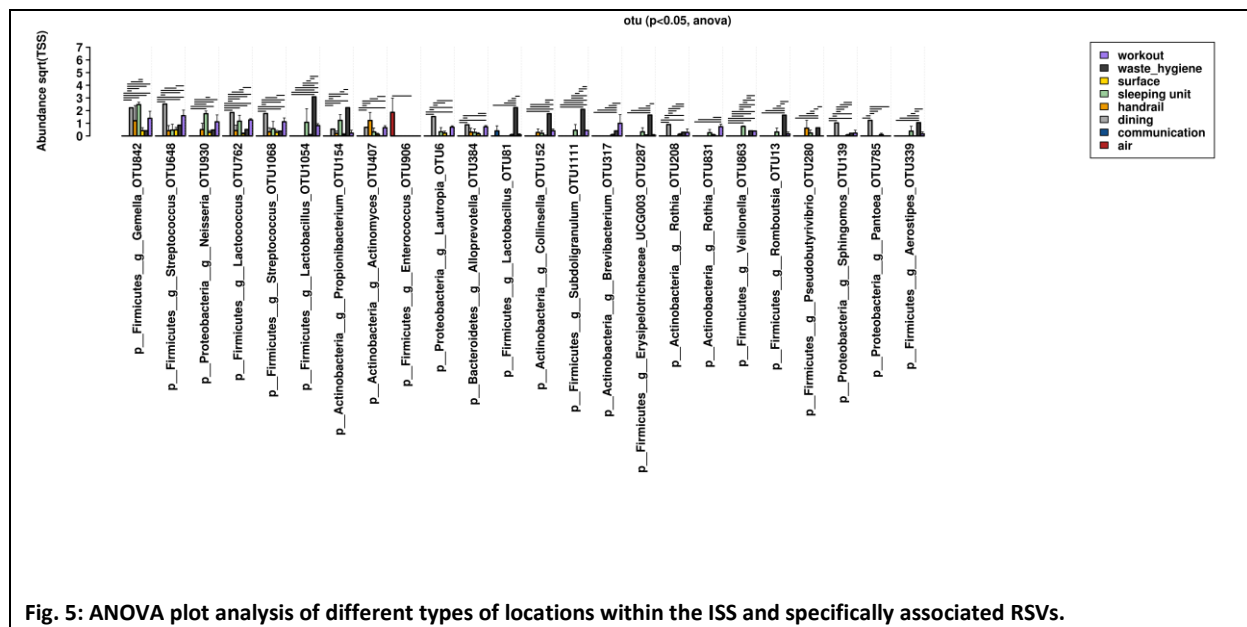

457 According to a hierarchical cluster analysis based on Pearson's correlation across session A and B  
 458 (Fig. 6), a positive correlation of certain microbial phyla with sampled locations was found, being in  
 459 agreement with findings from the cultivation assays (e.g. *Deinococcus* sp. was isolated from  
 460 Node2\_Panel\_Outside). Columbus handrails were found to be correlated with e.g. *Saccharibacteria*  
 461 and *Bacteroidetes*. A particular pattern was detected for the archaeal signatures retrieved, which  
 462 were found to be indicative for the sleeping unit (Thaumarchaeota), the handrails (Euryarchaeota)  
 463 and the samples from the Columbus\_SSC\_Laptop (Woesearchaeota).

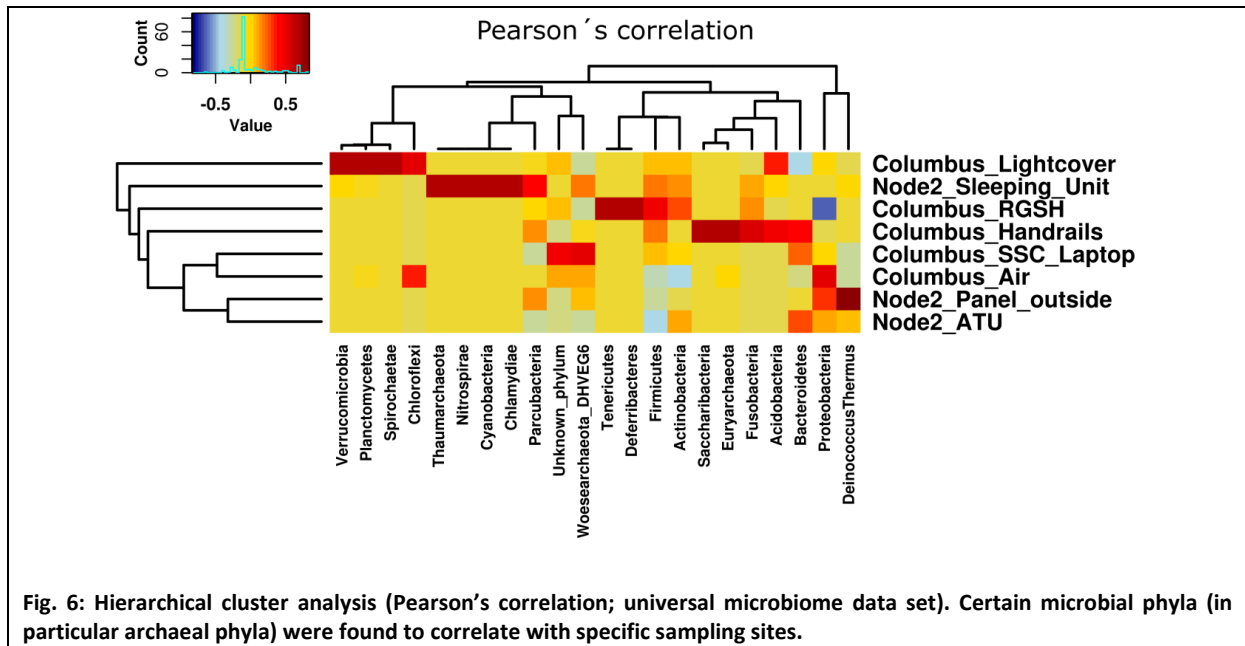

467

#### 468 **Microbial functions inferred from 16S rRNA gene information (Tax4fun) and metagenomic analyses**

469 As metagenomics could only be performed on pooled subset of samples (due to low biomass  
470 restrictions and sampling set-up, see below), Tax4fun analysis was initially used to predict potential  
471 microbial metabolic capabilities, their location-specificity and potential shifts over time.

472 LEfSe analysis (Fig. 7c) revealed a location specific predicted capacity of the microbial community,  
473 with e.g. increased predicted functions in KEGG pathway "Base\_excision\_repair" in samples from the  
474 cupola module, a probably indicator for elevated radiation levels.

475 On gene level, different functions were predicted, indicative of a respective module. Node 3 (ARED,  
476 treadmill and WHC) revealed predicted signatures of cobalt/nickel and antibiotic transport system  
477 ATP binding proteins. Notably, a specific increase of a cobalt/zinc/cadmium resistance protein was  
478 predicted for Node 2 (sleeping area and panel samples), an iron complex transport system substrate  
479 binding protein for Node 1 (e.g. dining area), and an antibiotic transport system permease protein for  
480 the cupola area. This indicated a potential microbial competition and a relevance of transition metal  
481 components (e.g. from ISS materials) for the microbial community in these environments.

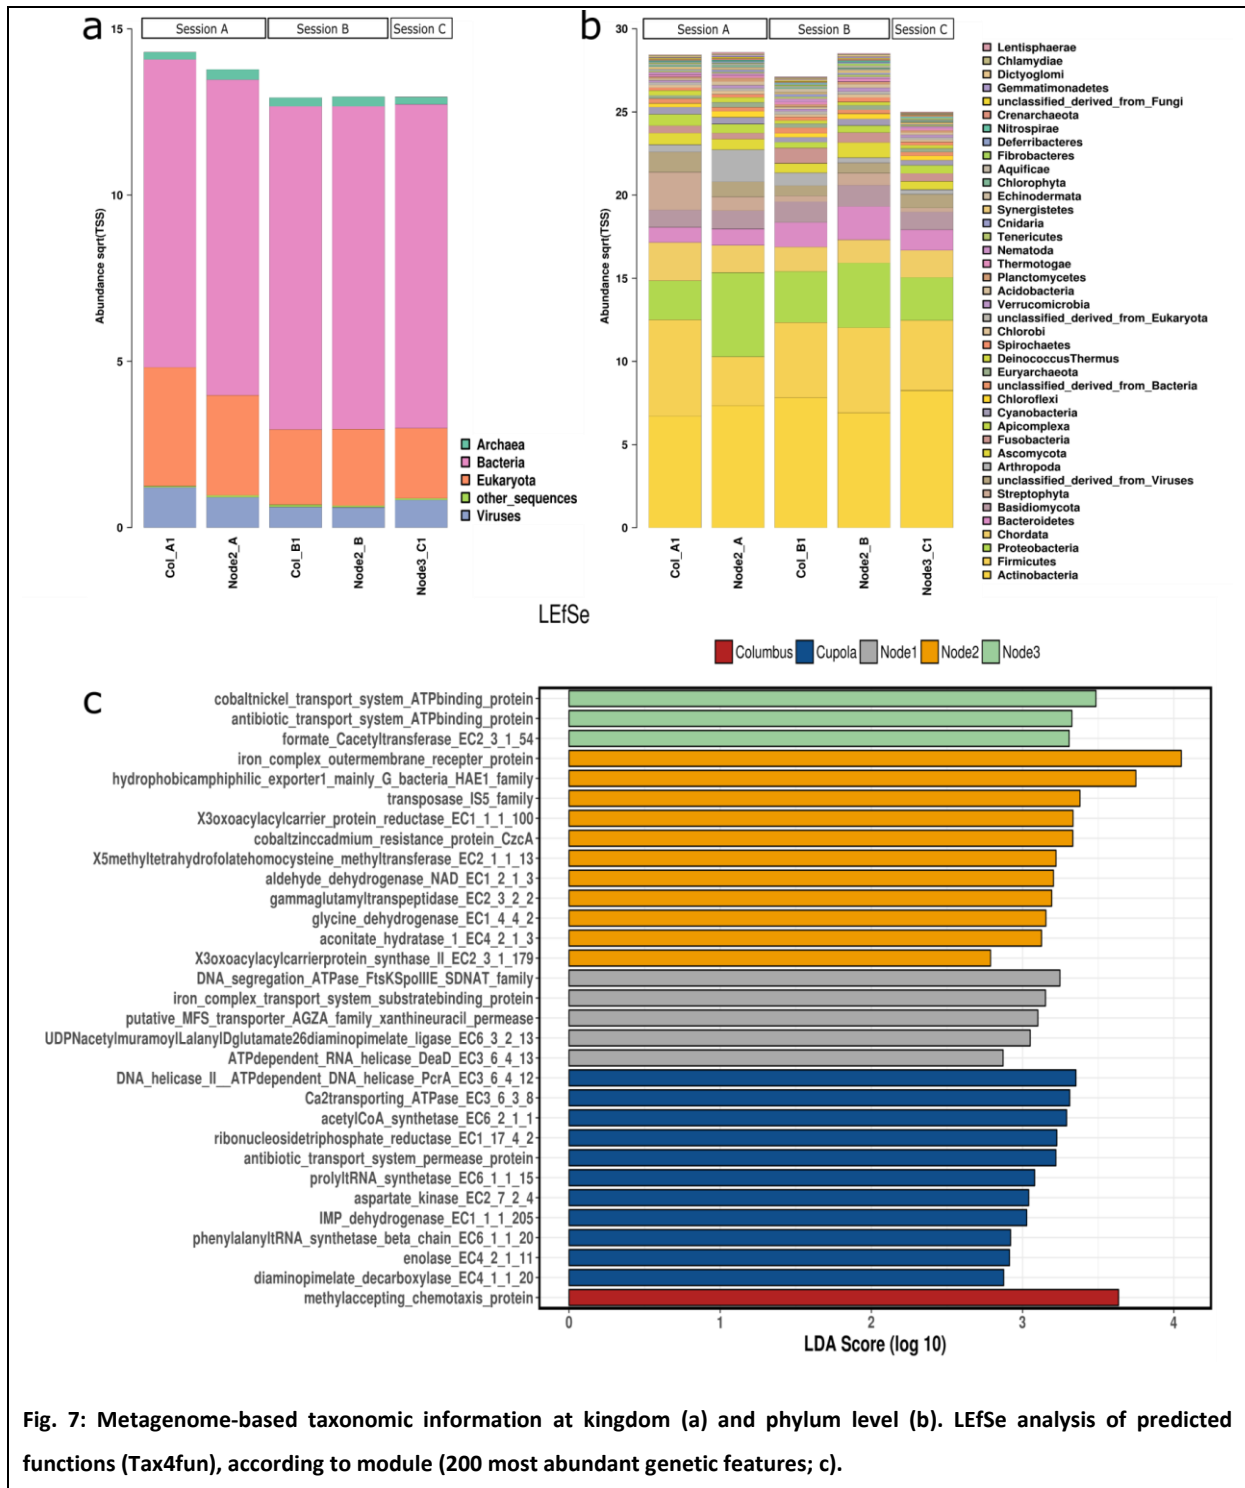

482

483 **Fig. 7: Metagenome-based taxonomic information at kingdom (a) and phylum level (b). LefSe analysis of predicted**  
 484 **functions (Tax4fun), according to module (200 most abundant genetic features; c).**

485

486 For metagenomics, samples were pooled as follows: All samples from Columbus module session A  
487 (COLA), all samples from Columbus module session B (COLB), all samples Node 1 session C (N1C), all  
488 samples Node 2 session A (N2A), all samples Node 2 session B (N2B), all Node 3 session C (N3C).

489 The taxonomic composition as retrieved from metagenomics was found to be somewhat different to  
490 the amplicon-based analysis. In particular the predominance of *Propionibacterium* reads was striking,  
491 as its signatures were not well reflected in the amplicon approach. However, *Staphylococcus*,  
492 *Corynebacterium*, *Streptococcus* could be confirmed as omnipresent on all sampled surfaces of the  
493 ISS. However, fungal (e.g. *Malassezia*), viral (e.g. *Microvirus*) and archaeal sequences (e.g.  
494 *Methanobrevibacter*) also belong to the core taxa of the ISS (Fig. 7a,b). Core microbial taxa and  
495 functions showed a stable distribution over different fractions of samples. Hence, 57% of all taxa and  
496 34% of all functions were shared in all samples (even higher proportions were visible when samples  
497 were grouped per module 68% and 51% or per sampling session 73% and 58% respectively).

498 Sample N2B showed the highest Shannon diversity on genus ( $H' \sim 4$ ) and functional level ( $H' \sim 10$ ).  
499 Similarity estimates based on Bray-Curtis distances revealed that microbes and their functions from  
500 the Columbus module showed the biggest difference to samples from Node 1, 2 and 3. In addition  
501 the Columbus module also experienced the biggest shift of its microbiome along PCoA Axis 1 (taxa:  
502  $\sim 60\%$ , functions  $\sim 40\%$ ) between the first and last sampling session.

503 Regarding functions, genes assigned to arginine biosynthesis (amino acid metabolism), degradation  
504 of L-Ornithine (amino acid metabolism), copper-translocating P-type ATPases (virulence, disease and  
505 defense), and the phage major capsid protein (phages, prophages, transposable elements) were  
506 ubiquitously distributed, whereas functions assigned to dormancy and sporulation, photosynthesis,  
507 motility and chemotaxis as well as aromatic compounds metabolism showed location-dependent  
508 variations. Functions involved in iron acquisition and metabolism (ferrous iron transport protein B:  
509 0.2% in functional core), potassium metabolism, nickel ABC transporters and others were highly  
510 abundant, indicating a potential surface-interaction with ISS materials.

511

## 512 **ISS cultivable microbial community reveals extremotolerant traits**

513 In the course of this study, hundreds of colonies/cultures retrieved on/in various media were  
514 processed, resulting in 76 unique bacterial isolates. Along with the bacteria, also fungi were isolated,  
515 but are not further analyzed herein. These included *Aspergillus* species (*A. sydowii*, *A. unguis*),  
516 *Chaetomium globosum*, *Penicillium* species (*P. aurantiogriseum*, *P. brevicompactum*, *P. chrysogenum*,  
517 *P. crustosum*, *P. expansum*), *Rhizopus stolonifera* and *Rhodotorula mucilaginosa*. All fungal isolates

518 obtained in this study were assigned to biosafety risk group S1. *P. brevicompactum*, *P. chrysogenum*,  
 519 *P. crustosum*, *R. stolonifera* and *R. mucilaginoso* may cause allergenic reactions and *R. mucilaginoso*  
 520 can also act as opportunistic pathogen. Archaea could not be grown from any sampling site.

521 Most of the bacterial isolates showed a distinct pattern in origin distribution and special  
 522 growth/enrichment characteristics, which is shown in Fig. 8.

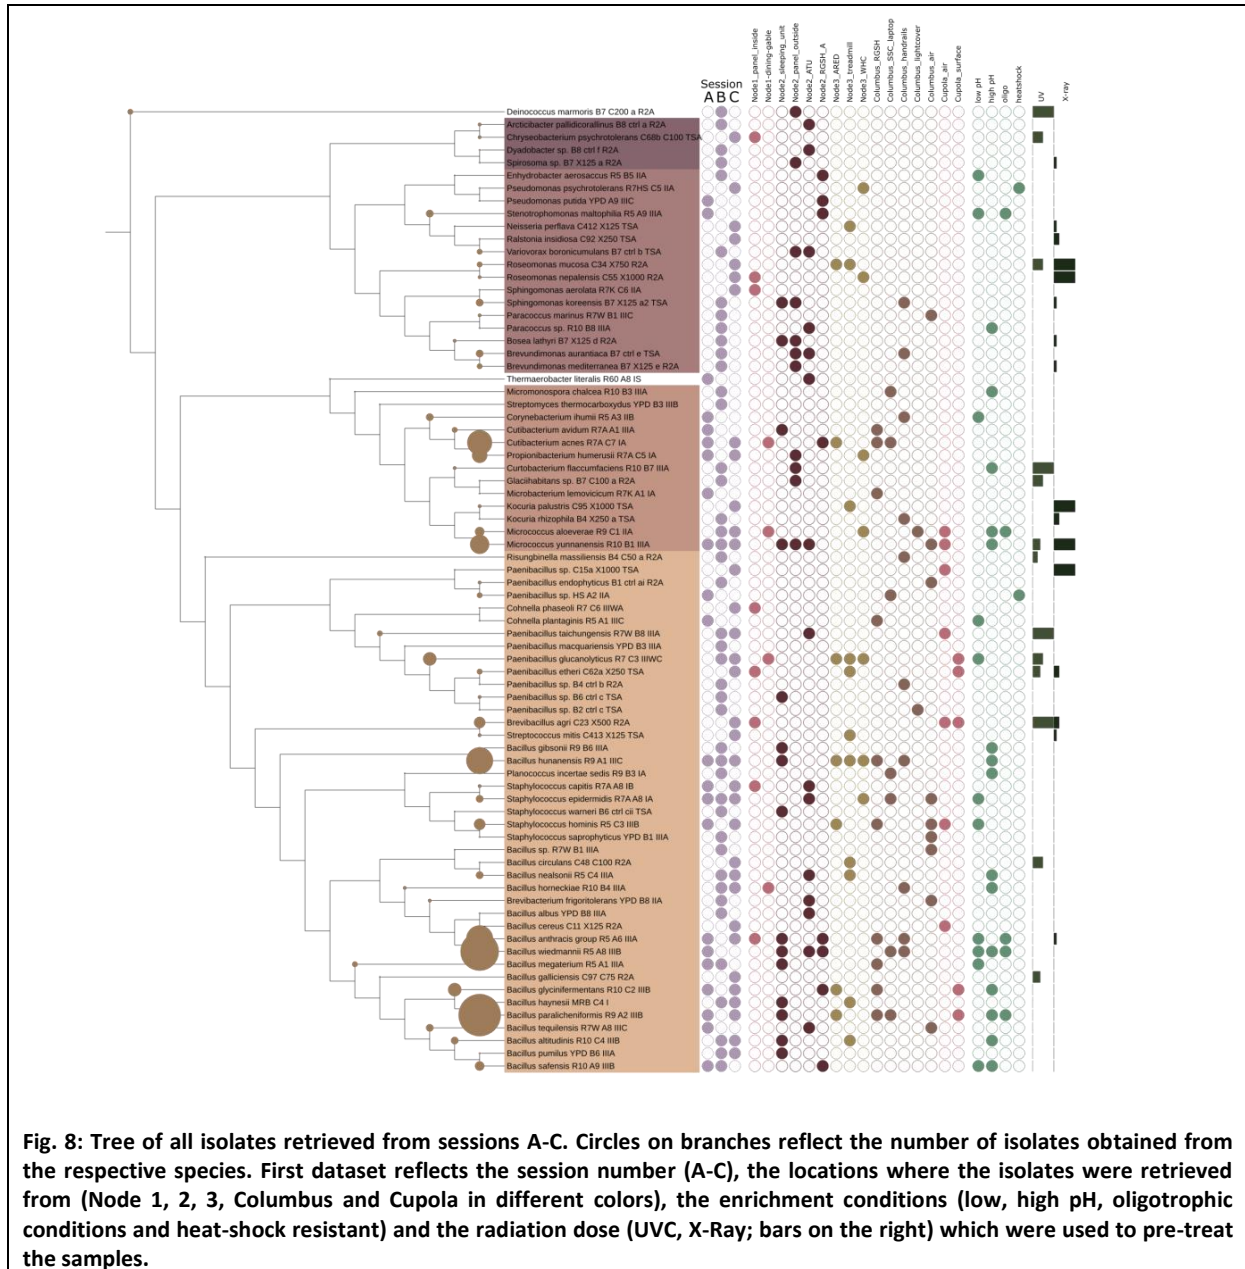

529 It shall be noted, that a number of isolates was obtained under stringent cultivation or pre-treatment  
 530 conditions. This included i) UV- and X-ray resistant microorganisms, such as *Deinococcus marmoris*,  
 531 *Curtobacterium flaccumfaciens*, *Brevibacillus agri* ( $UV_{254\text{ nm}}: 200\text{ J/m}^2$ ), *Roseomonas* species, *Kocuria*  
 532 *palustris*, *Micrococcus yunnanensis*, *Paenibacillus* sp. (X-ray: 1000 Gy), ii) microorganisms growing  
 533 particularly at high or low pH, or iii) heat-shock survivors (*Pseudomonas psychrotolerans*,



534 *Paenibacillus* sp.) (Fig. 7). Isolates retrieved under non-mesophile conditions were, for example,  
535 *Thermaerobacter literalis* (a true thermophile isolated at 65°C from the ATU in Node2, does not grow  
536 below 50°C), *Sphingomonas aerolata* and *Microbacterium lemovicicum* (exhibiting extraordinary  
537 cryotolerance, isolated only at 4°C, maximal growth temperatures were 51°C and 32°C, respectively).

538

539 **Physiological characteristics and resistance potential of ISS microbes do not differ from ground**  
540 **controls.**

541 In the next step, we analyzed physiological characteristics of ISS microbial isolates. In particular, we  
542 were interested whether they withstand physical and chemical stressors better than same or closely  
543 related microbial species from ground controls.

544 For these tests, we selected a subset of microbial isolates from the ISS, spanning 11 microbial genera  
545 of interest (listed in Fig. 9). This list included typical confined-indoor bacteria, like *Bacillus*,  
546 *Micrococcus* and *Staphylococcus*, but also microorganisms of special interest (associated to  
547 spacecraft assembly, extraordinary hardy, extremophile) were included (e.g. *Microbacterium*,  
548 *Cupriavidus*, or *Ralstonia*). For comparative reasons, we included also eight microbial isolates from  
549 ground controls (cleanrooms, Concordia station) or culture collections. Overall, the final list  
550 comprised 29 different microbial strains.

551 All these strains were tested with respect to heat-shock resistance in the stationary phase (*Bacillus*  
552 cultures contained spores), upper and lower temperature limit (growth), upper and lower pH limit  
553 (growth), and resistance towards a variety of antibiotics (Fig. 9).

554 Antimicrobial susceptibility testing for 17 clinically relevant antibiotics was performed. Antibiotic  
555 resistance/susceptibility was found to be in some cases strain-specific but mostly species/genus-  
556 specific, independent from their isolation source (ISS or ground control). In particular the tested  
557 *Bradyrhizobium* species showed a vast resistance against numerous antibiotics, as did one  
558 *Roseomonas* strain. The antibiotic resistance pattern was judged following the EUCAST guidelines for  
559 PK/PD (non-species related) or, for *Staphylococcus* isolates, *Staphylococcus* spp. breakpoints (14)  
560 were used. It has to be stressed that all tested isolates were non-pathogenic and that these results  
561 shall not be used for clinical risk assessment of any kind. The ISS strains were not found to be  
562 significantly more resistant (number of antibiotics or concentration) than their counterparts from  
563 ground controls.

564 Notably, the strains showed a growth temperature span of 18 to 52 degrees (14-32°C, *Roseomonas*  
565 C63; *Bacillus pumilus*, 4-56°C). The minimal and maximal growth temperatures, or the temperature

566 span, were not significantly different in ISS isolates compared to control microorganisms (Mann-  
 567 Whitney U Test). For growth at different pH values, the isolates revealed a pH span of 4 to 10 pH  
 568 values (*Bradyrhizobium erythroplei* LMG28425, pH3-7; *Bacillus altitudinis* R10\_C4\_IIIB, pH 2-12). As  
 569 seen for the temperature, no significant difference in pH preference of ISS strains versus ground  
 570 control strains was observed (Mann-Whitney U Test).

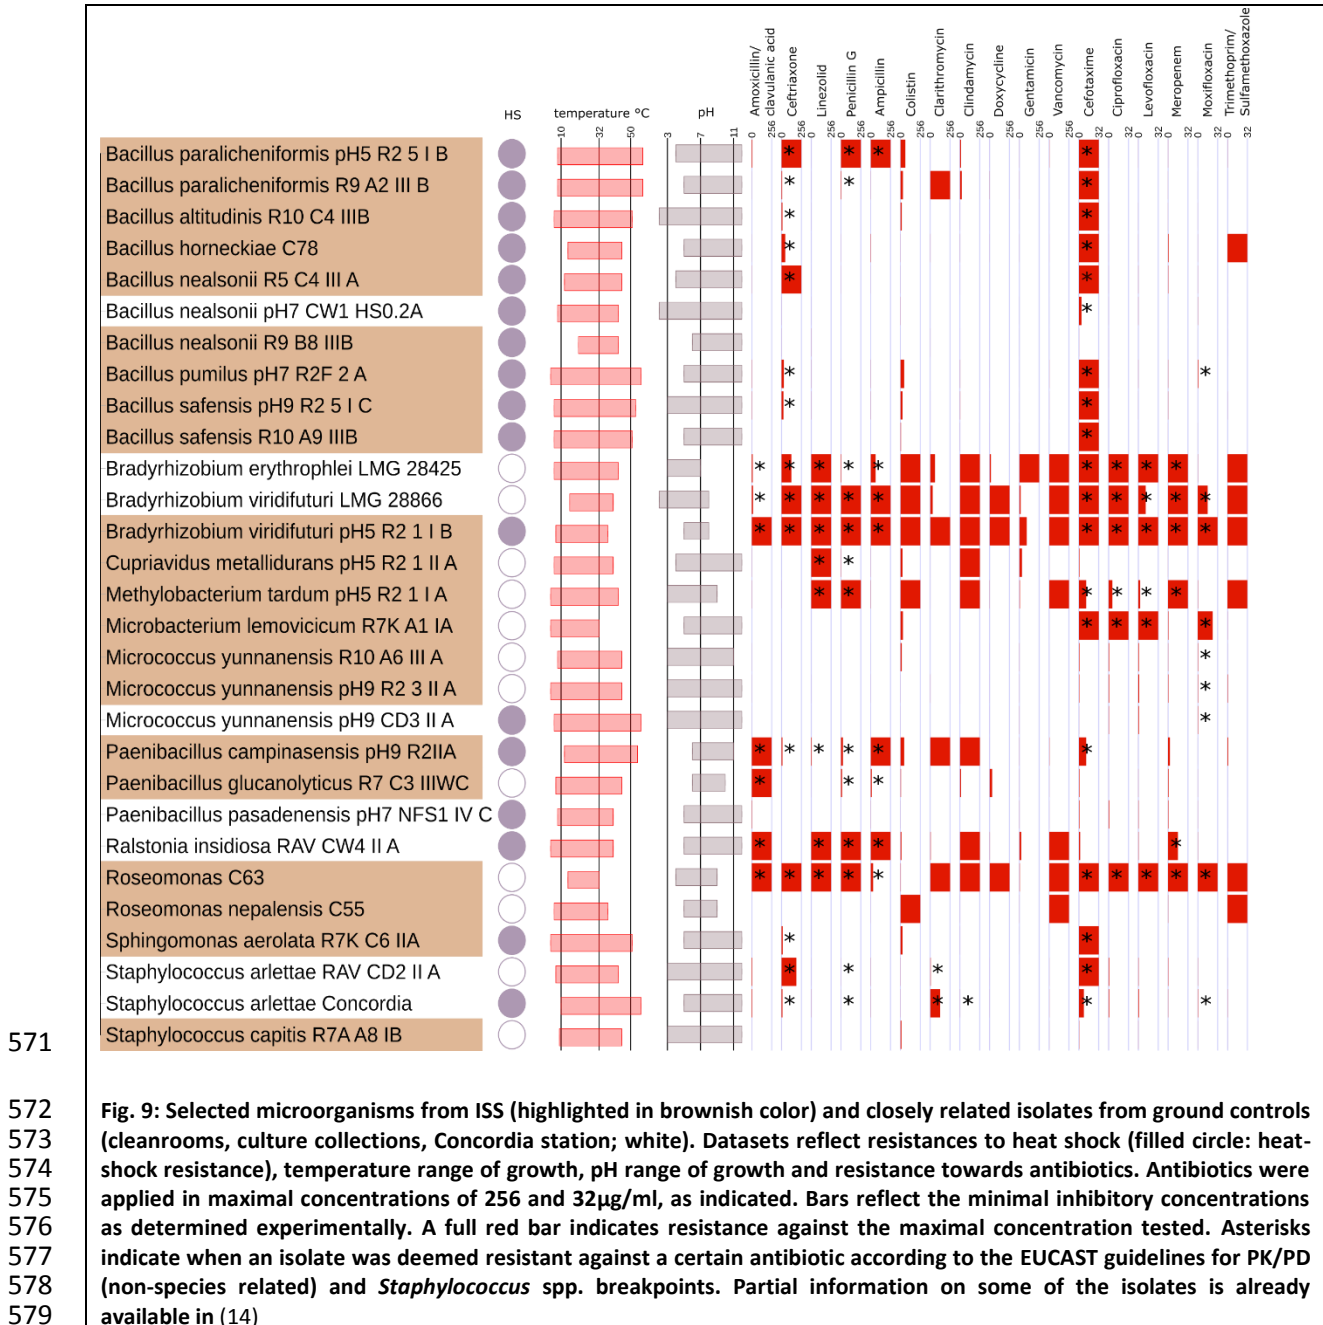

580

581

582 **Genomic properties of ISS isolates showed no differences to non-ISS neighbors, but revealed**  
583 **partial discrepancy of genomic and experimentally observed antibiotics resistance patterns**

584 In order to understand the specific genomic characteristics of ISS microorganisms, we selected six  
585 different species for genome sequencing and reconstruction, namely: *Bacillus pumilus* strain  
586 pH7\_R2F\_2\_A, *Bacillus safensis* strain pH9\_R2\_5\_I\_C. *Bradyrhizobium viridifuturi* strain  
587 pH5\_R2\_1\_I\_B, *Cupriavidus metallidurans* strain pH5\_R2\_1\_II\_A, *Methylobacterium tardum* strain  
588 pH5\_R2\_1\_I\_A and *Paenibacillus campinasensis* strain pH9\_R2IIA (41) and compared the assemblies  
589 to publicly available genomes.

590 The genome of *Bacillus pumilus* strain pH7\_R2F\_2\_A was retrieved 99.59% complete, with a %GC of  
591 41.6. The overall genome length was 3.7 Mbp. *Bacillus pumilus* SAFR-032 (3.7 Mbp, 41.3 %GC; ENA  
592 study ID: PRJNA20391), whose genome was analysed for comparative reasons as well, possessed the  
593 same antibiotics resistance capacity. The ISS strain possessed all necessary genes for flagellum  
594 assembly and CAS-TypellIB (with *cmr5*\_TypellIB missing); the latter was not found in *Bacillus pumilus*  
595 SAFR-032. Looking at the metabolic profiles, the ISS isolate of *Bacillus pumilus* (comparison to SAFR-  
596 032 and ATCC 7061 (3.8 Mbp, 41.7 %GC; ENA study ID: PRJNA29785) possessed the genomic capacity  
597 to perform choline and methionine degradation, but no other peculiarities were identified.

598 The genome of *Bacillus safensis* strain pH9\_R2\_5\_I\_C was found to be 99.59% complete, with a %GC  
599 of 41.5. The overall genome length was 3.7 Mbp. It possessed all necessary genes for flagellum  
600 assembly and CAS-TypellIB, as did next neighbour *Bacillus safensis* FO-36b. Looking at the metabolic  
601 profiles, the ISS isolate of *Bacillus safensis* (comparison to CFA06 (3.7 Mbp, 41.5 %GC; ENA Study ID:  
602 PRJNA246604) and FO-36b (3.7 Mbp, 41.6 %GC; ENA Study ID: PRJNA270528) did not show certain  
603 peculiarities.

604 The genome of *Bradyrhizobium viridifuturi* strain pH5\_R2\_1\_I\_B was found to be 99.96% complete,  
605 with a %GC of 64.3. The overall genome length was 7.9 Mbp. The genome carried several copies of  
606 the efflux pump membrane transporter BepG as well as other multidrug efflux transporters and  $\beta$ -  
607 lactamase genes, which largely explained the overall stable antibiotic resistance observed in our  
608 experiments. The observed resistances against linezolid and vancomycin could not be directly  
609 inferred from the genomic data. These features were also found in *Bradyrhizobium viridifuturi* SEMIA  
610 690 (8.8 Mbp, 64.0 %GC; ENA Study ID: PRJNA290320), the next phylogenetic neighbour. Overall, the  
611 genetic features of our ISS isolate were widely similar to known *Bradyrhizobium* species. The only  
612 differences found were the potential capability for homospermidine biosynthesis from putrescine  
613 and (R)-acetoin biosynthesis through (S)-2-acetolactate.

614 The genome of *Cupriavidus metallidurans* strain pH5\_R2\_1\_II\_A was found to be 99.94% complete,  
615 with a GC content of 63.7 %. The overall genome length was 6.9 Mbp. This strain carries three bepE  
616 efflux pump membrane transporters, and also a multidrug efflux system protein (acrB). However, the  
617 bepE efflux pumps were not detected in the genome of its closest relative *C. metallidurans* CH34. The  
618 genome showed full potential for type IV pili and flagella formation and numerous secretion systems,  
619 but this was not a unique feature for the ISS strain. With respect to the metabolic profile, *C.*  
620 *metallidurans* strain pH5\_R2\_1\_II\_A showed a number of different features when being compared to  
621 the next relatives (*C. basilensis* OR16, ENA Study ID: PRJNA79047; *C. metallidurans* CH34, ENA Study  
622 ID: PRJNA250; *C. necator* N-1, ENA Study ID: PRJNA67893; *C. taiwanensis* LMG19424, ENA Study ID:  
623 PRJNA15733), which included the predicted capacity for 5,6-dimethylbenzimidazole biosynthesis and  
624 butanediol degradation/synthesis.

625 The genome of *Methylobacterium tardum* strain pH5\_R2\_1\_I\_A was found to be 100% complete with  
626 a GC content of 69.2%, and a total genome length of 6.5 Mbp. Also *M. tardum* pH5\_R2\_1\_I\_A carried  
627 the efflux pump membrane transporter BepE and the genetic capacity for flagellum formation and  
628 several secretion systems. The strain showed a number of differential features when we compared  
629 the genomic potential with other members of the genus (*M. extorquens*, *M. mesophilicum*, *M.*  
630 *nodulans*, *M. populi*, *M. radiotolerans*; 5,6-dimethylbenzimidazole biosynthesis, base-degraded  
631 thiamine salvage, cytidyl molybdenum cofactor biosynthesis, L-dopachrome biosynthesis);  
632 however, it shall be noted, that another genome of the species was not available at the time of  
633 analysis.

634 The genome of *Paenibacillus campinasensis* strain pH9\_R2IIA could be retrieved with a 99.84%  
635 completeness. It showed a GC content of 52.26%, and a genome length of 5.4 Mbp. The genome  
636 revealed a potential for lincosamide (Clindamycin), macrolide (clarithromycin), fluorquinolone  
637 (moxifloxacin, levofloxacin, ciprofloxacin), and glycopeptide (vancomycin) resistance which could all  
638 be verified by the antimicrobial susceptibility tests with the exception of the vancomycin resistance  
639 (no PK/PD breakpoint in the EUCAST table). Nevertheless, the observed MIC for vancomycin was 4  
640 µg/ml, which was the highest observed MIC for vancomycin besides the seven isolates which were  
641 completely resistant (see Fig. 8). The genome did not show any β-lactam resistances but in spite of  
642 this, *Paenibacillus campinasensis* strain pH9\_R2IIA was resistant against all β-lactam antibiotics with  
643 the exception of meropenem in the antimicrobial susceptibility tests. The strain showed the potential  
644 for flagella formation, and the presence of CAS type III. At the time of the analysis there was no other  
645 genome of this species publically available, but the metabolic potential was not found to be strikingly  
646 different from other genome-sequenced members of the *Paenibacillus* genus.

647 The antibiotic resistance genes (ARG) detected in the sequenced genomes and the inferred antibiotic  
 648 resistances are summarized in Fig. 10. These detected ARGs conformed for the most part with the  
 649 results from the antimicrobial susceptibility tests; however, there were also some discrepancies. For  
 650 example, both *Bacillus* strains had genes for the transcription-repair coupling factor *mfd* and the  
 651 efflux transporter *blt* which should provide resistance against multiple fluorquinolones, but *Bacillus*  
 652 *pumilus* strain pH7\_R2F\_2\_A was only resistant against moxifloxacin and not against ciprofloxacin or  
 653 levofloxacin, while *Bacillus safensis* strain pH9\_R2\_5\_I\_C was sensitive against all tested  
 654 fluorquinolones. *C. metallidurans* was unharmed by the lincosamide clindamycin and the  
 655 oxazolidinone linezolid and grew at the maximal tested concentrations of these antibiotics, but these  
 656 resistances could not be inferred from the ARG's. Moreover, *C. metallidurans* was sensitive to all  
 657 fluoroquinolones and  $\beta$ -lactam antibiotics besides Penicillin G in spite of possessing several efflux  
 658 transporter genes from which a resistance against fluorquinolones can be inferred and also the  $\beta$ -  
 659 lactamase AmpC which is a specialized cephalosporinase and infers resistance against the tested  
 660 cefotaxime and ceftriaxone. However, it is known that these two cephalosporins, while being  
 661 sensitive to AmpC, are only weak inducers for actual AmpC expression (60).

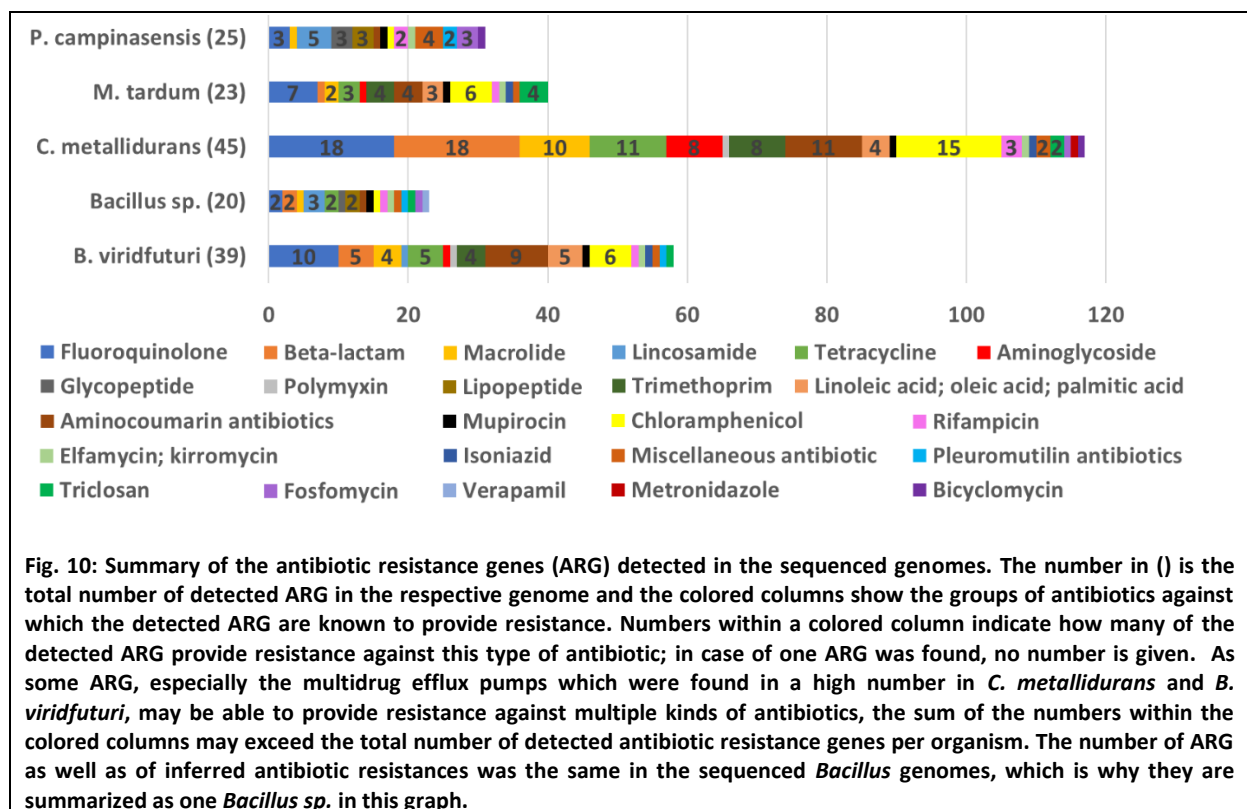

## 672 The ISS microbiome in context: humans and the cleanroom as a contamination source

673 The microbiome of an ISS cargo-harboring cleanroom, which we analyzed for comparative reasons,  
 674 was found to be different from the ISS microbiome. The microbial diversity detected in cleanrooms  
 675 was significantly lower than observed in ISS samples (ANOVA;  $p=0.012$ ; Shannon diversity index) and

676 clustered separately in multivariate analyses (Fig. 11). The cleanroom microbiome was specifically  
677 characterized by a predominant abundance of  $\alpha$ -Proteobacteria such as *Novosphingobium*,  
678 *Sphingomonas* and *Methylobacterium* whereas most ISS samples were dominated by Firmicutes and  
679 Actinobacteria. This is in accordance with previous findings (13). Based on this observation, we argue  
680 that the items delivered from terrestrial cleanrooms to the ISS are most likely not a (relevant)  
681 microbiome source.

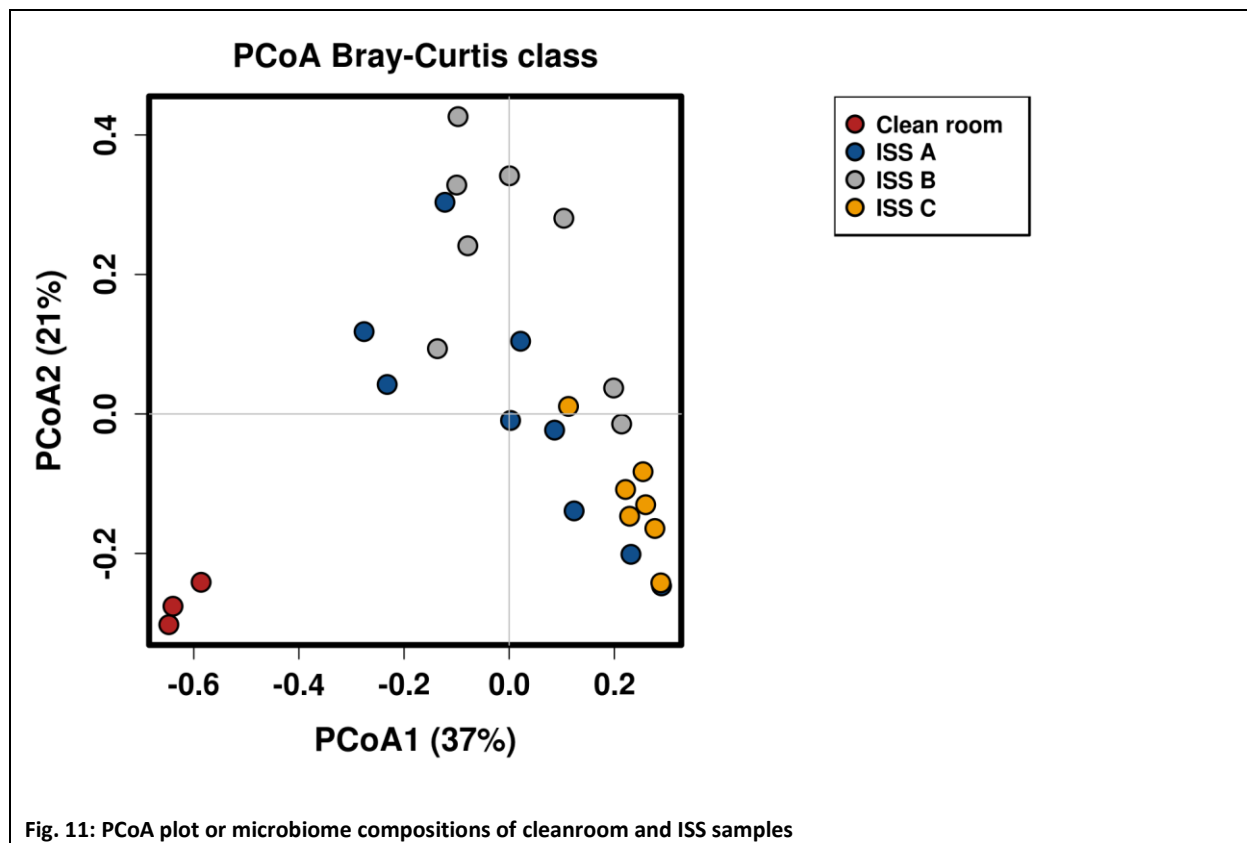

685 However, a more detailed picture was obtained, when we looked at the cultivable diversity retrieved  
686 from ISS and cleanroom samples (Fig. 12), where we found an overlap of several bacterial species,  
687 including: *Bacillus cereus*, *B. aerophilus*, *B. subtilis*, *B. nealsonii*, *Micrococcus aloeverae*, *M.*  
688 *yunnanensis*, *Kocuria palustris*, *Ralstonia insidiosa*. Human-associated microorganisms, such as e.g.  
689 *Micrococcus* species, were more likely introduced by humans into both environments than  
690 transported via cargo from cleanrooms to the ISS. Nevertheless, this comparison indicates a potential  
691 transfer of cleanroom associated microorganisms (such as *Bacillus* species) onto the ISS where they  
692 established themselves as a part of the ISS microbial community. Based on the total cultivable  
693 diversity they comprise only a minor fraction of the ISS microbial community.

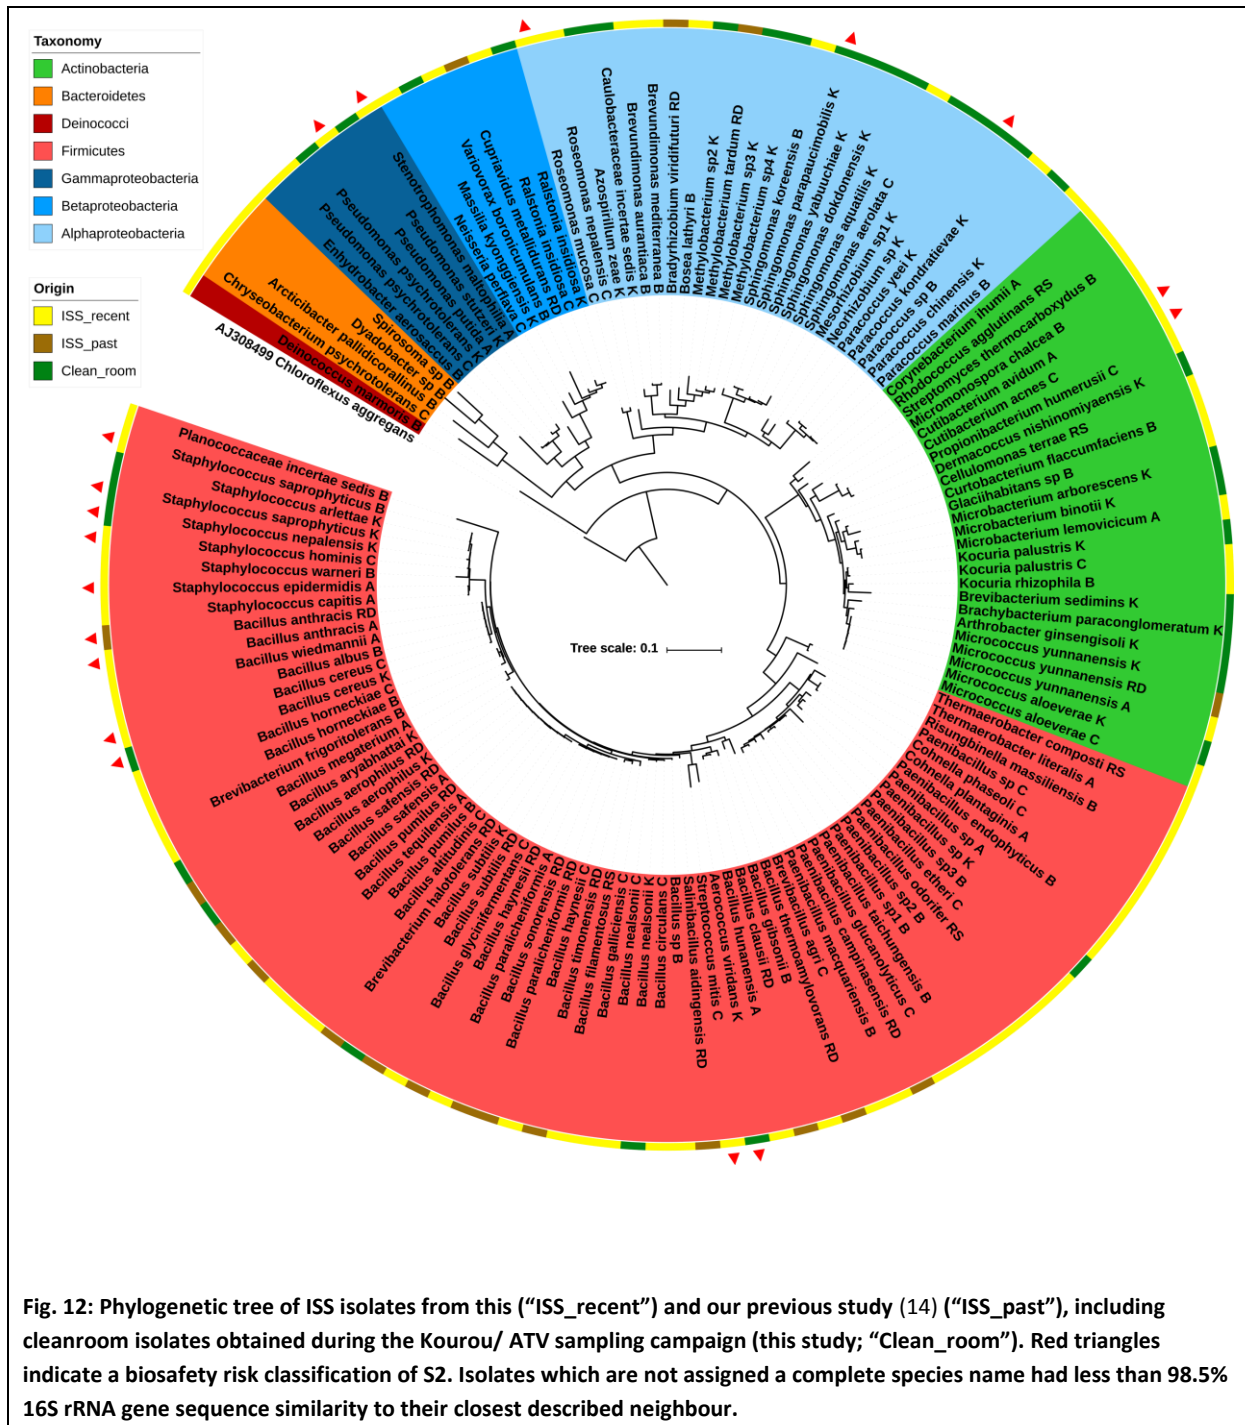

694

695

696

697

698

699

700

## 701 The ISS is a source of novel microbial species

702 The application of 21 different cultivation approaches resulted in a high diversity of microbial isolates  
 703 from the ISS, and 22 of the bacterial genera obtained during this study have not been isolated from  
 704 ISS samples before, although most of them have been detected by molecular methods (12,13,19)  
 705 (*Arcticibacter*, *Bosea*, *Brevundimonas*, *Chryseobacterium*, *Cohnella*, *Curtobacterium*, *Cutibacterium*,  
 706 *Deinococcus*, *Dyadobacter*, *Enhydrobacter*, *Glaciihabitans*, *Micromonospora*, *Neisseria*, *Paracoccus*,

707 *Planococcus*, *Propionibacterium*, *Risunghinella*, *Roseomonas*, *Spirosoma*, *Stenotrophomonas*,  
708 *Thermaerobacter*, and *Variovorax*). Of our fungal isolates, only *Aspergillus unguis* was not found on  
709 the ISS before.

710 Additionally eleven of the ISS isolates obtained in this study might even qualify to comprise novel,  
711 hitherto undescribed bacterial species as their 16S rRNA gene sequence similarity to their respective  
712 closest described neighbor was below 98.5%. Six isolates thereof revealed a similarity lower than  
713 97%, including *Paenibacillus*, *Dyadobacter*, *Spirosoma* representatives. The isolate with the highest  
714 nucleotide difference was isolate R9\_B3\_IA sampled from the SSC laptop in the Columbus module, as  
715 closest neighbour was *Planococcus halocryophilus* (87.36% sequence identity), an extreme  
716 psychrophile isolated from arctic permafrost (61).

717

#### 718 **Do ISS microorganisms interact with ISS surfaces? Co-incubation experiments with ISS materials**

719 ISS isolates *Cupriavidus metallidurans* strain pH5\_R2\_1\_II\_A, *Bacillus paralicheniformis* strain  
720 R2A\_5R\_0.5 (14) and *Cutibacterium avidum* strain R7A\_A1\_III A were aerobically and anaerobically  
721 incubated together with untreated aluminium alloy platelets, eloxated aluminium alloy platelets, and  
722 pieces of NOMEX® fabric, to investigate if these isolates interact with these ISS surface materials.  
723 After incubation (6 weeks; 32°C; liquid R2A medium), the co-incubated materials were analyzed via  
724 scanning electron microscopy (Fig. 13). The NOMEX® fabric itself remained intact over time (Fig. 13, I-  
725 L, negative control), but served as an excellent attachment surface for *B. paralicheniformis* biofilms  
726 and single cells of *C. metallidurans*. The ability of *C. metallidurans* to attach to surfaces was found  
727 genetically encoded by pili formation capacity (see above).

728



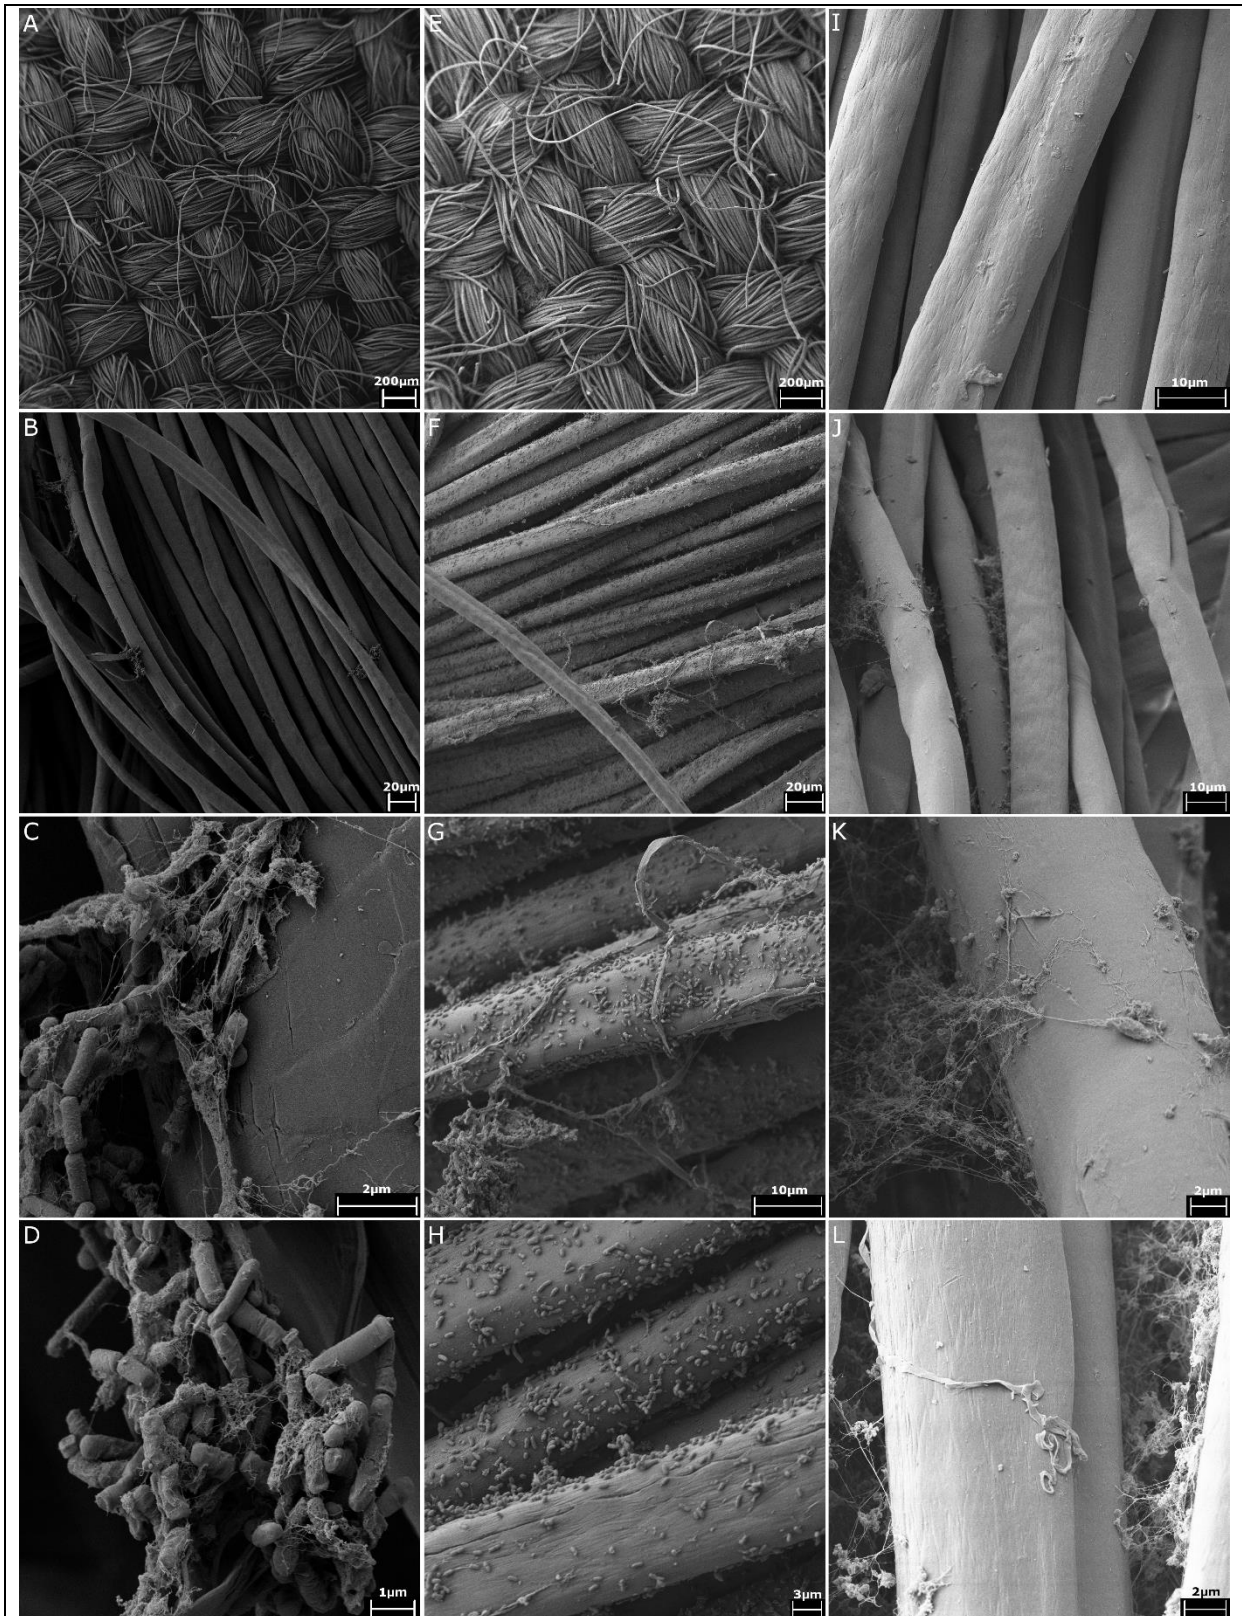

729

730

731

732

733

Fig. 13: Scanning electron micrographs of NOMEX® fabric which was co-incubated for six weeks with bacteria isolated from the ISS: A-D: Co-incubation with *Bacillus paralicheniformis*; E-H: Co-incubation with *Cupriavidus metallidurans*; I-L: Negative control of NOMEX® fabric kept in sterile medium for six weeks. Precipitates found in the negative control were found to be remnants of the medium/particles and did not contain microbial cells.

734

735 *B. paralicheniformis* did neither adhere to the untreated nor to the eloxated aluminum alloy.  
736 However, the untreated aluminum alloy which was co-incubated with *B. paralicheniformis* showed  
737 sporadic signs of corrosion compared to the untreated negative control incubated in sterile  
738 medium. All eloxated aluminum surfaces showed attached debris regardless if the incubation in the  
739 sterile medium was performed under oxic or anoxic conditions. Single cells of *C. metallidurans* also  
740 attached to the surfaces of untreated and eloxated aluminum alloys and their co-incubated  
741 aluminum alloys had a unique background surface pattern, which was distinct from their respective  
742 negative controls. Under anoxic conditions, *C. avidum* formed a biofilm attached to the surface of  
743 both, untreated and eloxated, aluminum alloys.

744

745

746 Discussion

---

747 In this study, we aimed to exploit the microbial information obtained from three sampling events  
748 aboard the International Space Station with respect to: i) microbial sources, diversity and distribution  
749 within the ISS, ii) functional capacity of microbiome and microbial isolates, iii) extremotolerance and  
750 antibiotics-resistance (compared to ground controls), and iv) microbial behavior towards ISS-relevant  
751 materials (biofilm formation, potential degradation or corrosion).

752 **Study limitations.** Spaceflight experiments especially suffer from the limitations given by the  
753 circumstances that cannot be influenced by the scientists. This affected e.g. the number of samples  
754 to be taken (limited mass of payload), the sampling procedure (compatible to microgravity conditions  
755 and safety requirements), selection of sampling time points (according to assigned crew time and the  
756 overall mission planning), and the delivery duration of the samples to the laboratory. Being aware of  
757 these circumstances, experiments were planned accordingly (> 5 years implementation phase), and  
758 numerous controls were run to ensure the integrity of the information retrieved.

759 **Microbiome sources and context.** Based on our observations and previous reports (10), we confirm a  
760 mostly human-associated microbiome aboard the ISS (62). Other proposed sources are cargo delivery  
761 (due to the detected overlap of cleanroom/ cargo and ISS microbial community), food (such as  
762 seasoning, dried fruits, nuts and herbs, or even probiotics (63) (as indicated by the presence of e.g.  
763 *Bacillus* and *Lactococcus* signatures), and potentially the personal belongings brought to the ISS  
764 (possibly reflected by the increased diversity in the personal sleeping unit microbiome). It shall be  
765 noted, that cargo deliveries are cleaned or even disinfected before upload (64,65), but an  
766 international standard for these procedures does not exist and thus the cleanliness of the cargo  
767 delivery might vary.

768 As a consequence, the ISS microbiome was characterized by a predominance of human (skin)-  
769 associated *Staphylococcus*, *Corynebacterium* and *Streptococcus* signatures (66). In general, these  
770 microorganisms are typical indicators for confined indoor environments (cleanrooms, space stations,  
771 hospital areas such as intensive care unit, operating rooms; (10)), emphasizing the substantial  
772 contribution of the human microbiome (see also (13)).

773 In more detail, all top 20 genera described in the hospital study (66) were also detected in the entire  
774 ISS microbiome (mostly also under top 20). *Enhydrobacter* (Pseudomonadales, a typical  
775 environmental species, (67)) was the only hospital top 20 genus which was not detected by the  
776 molecular approach in this study, but an *Enhydrobacter aerosaccus* isolate was obtained from the  
777 Columbus RGS sample in session B.

778 Within the top 20 list of the ISS microbial signatures, *Haemophilus*, *Aerococcus*, *Stenotrophomonas*,  
779 *Gemella*, *Bacteroides*, *Actinomyces*, *Veillonella*, *Granulicatella*, *Blautia*, *Propionibacterium* and

780 *Enterobacter* could not be found in the top 20 hospital list, indicating that those were relatively  
781 higher abundant in the ISS or even specific for this location.

782 All of these genera are typical human-associated microorganisms and thrive in the oral/respiratory  
783 tract (e.g. *Haemophilus*), on human skin (e.g. *Propionibacterium*) or the human gut (e.g. *Blautia*).  
784 Some of these microorganisms have opportunistic pathogenic potential, as also pointed out for  
785 *Enterobacter* species isolated from the ISS WHC (68). We obtained in total eleven ISS isolates  
786 belonging to biosafety risk group S2 during this study, including *Pseudomonas putida* isolated from  
787 the RGSH in Node2 and isolates of the *Bacillus cereus/anthracis/thuringensis* clade retrieved from the  
788 RGSHs in Node2 and Columbus, from the hand grips in Columbus, and from the sleeping unit in  
789 Node2. However, most of these are typical human-associated bacteria which have only opportunistic  
790 pathogenic potential. Especially in the light of a weakened human immune system in space  
791 conditions, the presence and abundance of such opportunistic pathogens has of course to be  
792 carefully monitored, but as these do thrive in and on the human body and are shed into the  
793 environment by the crew itself, such opportunistic pathogens will always exist in built environments  
794 and their presence *per se* is not alarming (10).

795

796 **ISS microbiome diversity, biogeography and dynamics.** The ISS microbiome was not found to be  
797 stable in composition and diversity, although a vast core microbiome existed over time and  
798 independent from location. However, specific microbial patterns could be identified for various  
799 functional areas within the station, as e.g. the WHC and RGSH showed the highest number of unique  
800 RSVs, and bacterial and in particular archaeal signatures were found to be specifically indicative for  
801 certain areas. This is in agreement with the observations of Ruiz-Calderon *et al.* that, increasing with  
802 the level of human interaction, indoor surfaces reflect space use and, besides, show increased  
803 content of human-associated microbial signatures (69).

804 Fluctuations in diversity and composition were detectable when two different time points (session A  
805 and B) were compared. It shall be mentioned, that no crew exchange took place during this period,  
806 but two cargo deliveries docked within this time frame (SpaceX and Soyuz), which could have  
807 influenced the microbiome composition. However, we detected an increase in specifically human  
808 (gut)-associated microorganisms (*Escherichia/Shigella*, *Lachnospirillum* etc.) over the sampling  
809 period, of which the reason is unknown.

810 A different picture was obtained from the cultivable diversity of the ISS microbial community, with  
811 *Micrococcus yunnanensis*, *Bacillus hunanensis*, *B. megaterium* and *B. safensis* and *Staphylococcus*  
812 *epidermidis* being cultivable from both sampling sessions, representing hardy (spore-forming) and  
813 human skin- associated microorganisms, whereas typical gut-associated microorganisms could not be  
814 retrieved by our enrichments, as our cultivation approaches were designed to target rather

815 environmental, extremotolerant microbes. Thus, the cultivation- and molecular-based microbial  
816 community analysis is not fully comparable due to the limitations in cultivation efforts.

817 Archaeal signatures were detected in 14 of the 24 ISS samples (universal and specific approach).  
818 Most earlier studies on the ISS microbiome ignored the possible presence of Archaea, but some of  
819 the more recent studies also reported the detection of Archaea aboard the ISS but did not further  
820 discuss their existence (19,21). We found, that archaeal signatures were nicely reflecting the  
821 frequency of human contact and the type of surface (see Fig. 5). The detected sequences of  
822 Thaumarchaeota, Woesearchaeota and *Methanobrevibacter* (Euryarchaeota) have all been  
823 attributed to the human microbiome before (70–72).

824

825 **Functional capacity of microbiome and microbial isolates, extemo-tolerance and antibiotics-**  
826 **resistance (compared to ground controls).** In our study, we confirmed the pangenome-based  
827 observation of Blaustein *et al.* (24), on genomic, but also on isolate and resistance-pattern level that  
828 ISS microorganisms are not necessarily more extremophilic or antibiotic resistant than their ground-  
829 relatives with respect to growth behavior, or antibiotics resistances, nor their genomic inventory.

830 We rather argue that the ISS environment supports selection of the best-adapted microorganisms  
831 (e.g. spore-formers) towards the partially extreme physical and chemical environmental conditions  
832 (e.g. radiation, alkaline cleaning agents), but does not induce general changes in the physiological nor  
833 genomic capacities of microbes. Thus, were not able to confirm the null hypothesis that strains  
834 obtained from the ISS are more extremotolereant/extremophilic than closely related strains from  
835 Earth regarding the upper and lower boundaries of their temperature and pH growth ranges. With  
836 the exception of *Bradyrhizobium viridifuturi* pH5\_R2\_1\_I\_B, all tested ISS isolates were able to grow  
837 at pH 9 or higher, which might be due to a selection pressure caused by alkaline cleaning reagents  
838 used on board the ISS.

839 Moreover, the data presented here show that the molecular detection of antibiotic resistance genes,  
840 while being a good approximation of the resistance potential of an organism or microbial community,  
841 does on the one hand overestimate the antibiotic resistance potential (as some resistance genes  
842 might not be expressed at all). On the other hand it does not necessarily cover all antibiotic-  
843 resistances which a microorganism actually has. Thus we advise coupling traditional cultivation  
844 approaches with molecular investigations to retrieve a full picture of the situation.

845 **Microbial surface interaction with ISS materials.** Although we could not confirm an increased threat  
846 of ISS microbiome towards crew's health, we observed that surface interaction is critical for the  
847 microbial community aboard. A variety of ISS surface materials are composed of metals, including  
848 alloy EN AW 2219 (aluminum copper magnesium), which might stress interaction with metal ions and

849 settlement. In our co-incubation experiments, we could confirm that ISS microbial isolates can  
850 adhere and grow on metal and in particular textile surfaces (NOMEX fabric), where local moisture  
851 (e.g. condensate) could support biofouling, biofilm formation and material damage through acid  
852 production (6,73–75). This is particularly important with respect to fungal growth, as these might  
853 affect human health indirectly by causing allergic reactions and asthmatic responses (17,76–78).

854 **Conclusion: Microbes aboard: Reason for concern?**

855 Although we cannot fully exclude a threat of the ISS microbiome towards crew health (in particular in  
856 interaction with the weakened human immune system) our data do not indicate direct reason for  
857 concern. However, we raise special attention to the microbial-surface interaction problem in order to  
858 avoid biofouling and biofilm formation, which could directly impact material integrity and indirectly  
859 human health and therefore pose a potential risk to mission success.

860

861

862 **Acknowledgements.**

863 We are thankful for financial support by the FFG (Austrian Research Promotion Agency, Project No.  
864 847977) and the European Space Agency (ESA) for financing and realization of this space project as  
865 part of the ELIPS program (ILSRA-2009-1053 ARBEX). We are very grateful for the scientific and  
866 technical support by Lobke Zuijderduijn, Stefanie Raffestin (sampling in Kourou), the BIOTESC team  
867 (Lucerne University of Applied Sciences), the ISS crew and all other involved members of space  
868 agencies and attached institutes. We thank Elisabeth Grohmann for providing a *Staphylococcus* strain  
869 isolated from the Concordia station. PhD student Maximilian Mora was supported by the local PhD  
870 program MolMed.

871

872 **References**

---

- 873 1. Sonnenfeld G, Shearer WT. Immune function during space flight. Nutrition [Internet].  
874 2002;18(10):899–903.
- 875 2. Aponte VM, Finch DS, Klaus DM. Considerations for non-invasive in-flight monitoring of  
876 astronaut immune status with potential use of MEMS and NEMS devices. Life Sci [Internet].  
877 2006;79(14):1317–33.
- 878 3. Wilson N. A Microbial Hitchhiker’s Guide to the Galaxy Researchers race to understand effects  
879 of deep space on microbiome. Bioscience. 2019 Jan;69(1):5–11.
- 880 4. Wilson JW, Ott CM, zu Bentrup KH, Ramamurthy R, Quick L, Porwollik S, et al. Space flight  
881 alters bacterial gene expression and virulence and reveals a role for global regulator Hfq. Proc  
882 Natl Acad Sci. 2007;104(41):16299–304.
- 883 5. Hammond TG, Stodieck L, Birdsall HH, Becker JL, Koenig P, Hammond JS, et al. Effects of  
884 Microgravity on the Virulence of *Listeria monocytogenes*, *Enterococcus faecalis*, *Candida*  
885 *albicans*, and Methicillin-Resistant *Staphylococcus aureus*. Astrobiology. 2013;13(11):1081–  
886 90.
- 887 6. Alekhova TA, Aleksandrova AA, Novozhilova TY, Lysak L V, Zagustina NA, Bezborodov AM.  
888 Monitoring of Microbial Degradors in Manned Space Stations. Appl Biochem Microbiol  
889 [Internet]. 2005;41(4):382–9.
- 890 7. Novikova ND, Polikarpov NA, Poddubko S V, Deshevaya EA. The results of microbiological  
891 research of environmental microflora of orbital station Mir. 2001.
- 892 8. Novikova ND. Review of the knowledge of microbial contamination of the Russian manned  
893 spacecraft. Microb Ecol. 2004;47(2):127–32.
- 894 9. Schwendner P, Mahnert A, Koskinen K, Moissl-Eichinger C, Barczyk S, Wirth R, et al. Preparing  
895 for the crewed Mars journey: microbiota dynamics in the confined Mars500 habitat during  
896 simulated Mars flight and landing. Microbiome. 2017;5(1):129.
- 897 10. Mora M, Mahnert A, Koskinen K, Pausan MR, Oberauer-Wappis L, Krause R, et al.  
898 Microorganisms in confined habitats: Microbial monitoring and control of the International  
899 Space Station, cleanrooms, operating rooms and intensive care units. Front Microbiol. 2016;7.
- 900 11. Coil DA, Neches RY, Lang JM, Brown WE, Severance M, Cavalier DD, et al. Growth of 48 built  
901 environment bacterial isolates on board the International Space Station (ISS). 2016.
- 902 12. Venkateswaran K, Vaishampayan P, Cisneros J, Pierson DL, Rogers SO, Perry J. International

- 903 Space Station environmental microbiome - Microbial inventories of ISS filter debris. *Appl*  
904 *Microbiol Biotechnol.* 2014;98(14):6453–66.
- 905 13. Checinska A, Probst AJ, Vaishampayan P, White JR, Kumar D, Stepanov VG, et al. Microbiomes  
906 of the dust particles collected from the International Space Station and Spacecraft Assembly  
907 Facilities. *Microbiome* [Internet]. 2015;3(1):1–18.
- 908 14. Mora M, Perras AK, Alekhova TA, Wink L, Krause R, Aleksandrova A, et al. Resilient  
909 microorganisms in dust samples of the International Space Station – survival of the adaptation  
910 specialists. *Microbiome.* 2016;4(1):65.
- 911 15. Nicholas AB, Avila-Herrera A, Allen JE, Singh N, Sielaff AC, Jaing C, et al. Whole metagenome  
912 profiles of particulates collected from the International Space Station. *Microbiome.*  
913 2017;5(1):81.
- 914 16. Voorhies AA, Lorenzi HA. The challenge of maintaining a healthy microbiome during long-  
915 duration space missions. *Front Astron Sp Sci.* 2016;3:23.
- 916 17. Romsdahl J, Blachowicz A, Chiang AJ, Singh N, Stajich JE, Kalkum M, et al. Characterization of  
917 *Aspergillus niger* Isolated from the International Space Station. *mSystems.* 2018;3(5):e00112–  
918 8.
- 919 18. Seuylemezian A, Vaishampayan P, Cooper K, Venkateswaran K. Draft Genome Sequences of  
920 *Acinetobacter* and *Bacillus* Strains Isolated from Spacecraft-Associated Surfaces. *Genome*  
921 *Announc.* 2018;6(6):e01554–17.
- 922 19. Lang JM, Coil DA, Neches RY, Brown WE, Cavalier D, Severance M, et al. A microbial survey of  
923 the International Space Station (ISS). *PeerJ.* 2017;5:e4029.
- 924 20. Urbaniak C, Sielaff AC, Frey KG, Allen JE, Singh N, Jaing C, et al. Detection of antimicrobial  
925 resistance genes associated with the International Space Station environmental surfaces. *Sci*  
926 *Rep.* 2018;8(1):814.
- 927 21. Singh NK, Wood JM, Karouia F, Venkateswaran K. Succession and persistence of microbial  
928 communities and antimicrobial resistance genes associated with International Space Station  
929 environmental surfaces. *Microbiome.* 2018;6(1):204.
- 930 22. Crucian B, Babiak-Vazquez A, Johnston S, Pierson DL, Ott CM, Sams C. Incidence of clinical  
931 symptoms during long-duration orbital spaceflight. *Int J Gen Med.* 2016;9:383.
- 932 23. Van Houdt R, Mijndonckx K, Leys N. Microbial contamination monitoring and control during  
933 human space missions. *Planet Space Sci.* 2012;60(1):115–20.
- 934 24. Blaustein RA, McFarland AG, Maamar S Ben, Lopez A, Castro-Wallace S, Hartmann EM.  
935 Pangenomic Approach To Understanding Microbial Adaptations within a Model Built  
936 Environment, the International Space Station, Relative to Human Hosts and Soil. *mSystems.*  
937 2019;4(1):e00281–18.
- 938 25. Watve M, Shejval V, Sonawane C, Rahalkar M, Matapurkar A, Shouche Y, et al. The 'K' selected  
939 oligophilic bacteria: A key to uncultured diversity? *Curr Sci.* 2000;1535–42.
- 940 26. Stieglmeier M, Wirth R, Kminek G, Moissl-Eichinger C. Cultivation of anaerobic and  
941 facultatively anaerobic bacteria from spacecraft-associated clean rooms. *Appl Environ*  
942 *Microbiol.* 2009;75(11):3484–91.
- 943 27. Balch WE, Fox GE, Magrum LJ, Woese CR, Wolfe RS. Methanogens: reevaluation of a unique



- 944 biological group. *Microbiol Rev.* 1979;43(2):260.
- 945 28. Sauder LA, Albertsen M, Engel K, Schwarz J, Nielsen PH, Wagner M, et al. Cultivation and  
946 characterization of *Candidatus Nitrosocosmicus exaquare*, an ammonia-oxidizing archaeon  
947 from a municipal wastewater treatment system. *ISME J.* 2017;11(5):1142.
- 948 29. Stieglmeier M, Rettberg P, Barczyk S, Bohmeier M, Pukall R, Wirth R, et al. Abundance and  
949 diversity of microbial inhabitants in European spacecraft-associated clean rooms. *Astrobiology*  
950 [Internet]. 2012;12(6):572–85.
- 951 30. Yoon SH, Ha SM, Kwon S, Lim J, Kim Y, Seo H, et al. Introducing EzBioCloud: A taxonomically  
952 united database of 16S rRNA gene sequences and whole-genome assemblies. *Int J Syst Evol*  
953 *Microbiol.* 2017;67(5):1613–7.
- 954 31. Kõljalg U, Nilsson RH, Abarenkov K, Tedersoo L, Taylor AFS, Bahram M. Towards a unified  
955 paradigm for sequence-based identification of fungi. *Mol Ecol.* 2014;22(November  
956 2013):5271–7.
- 957 32. Ratnasingham S, Hebert PDN. BARCODING, BOLD : The Barcode of Life Data System  
958 ([www.barcodinglife.org](http://www.barcodinglife.org)). *Mol Ecol Notes.* 2007;7(April 2016):355–64.
- 959 33. Price MN, Dehal PS, Arkin AP. FastTree 2—approximately maximum-likelihood trees for large  
960 alignments. *PLoS One.* 2010;5(3):e9490.
- 961 34. Letunic I, Bork P. Interactive Tree Of Life (iTOL): an online tool for phylogenetic tree display  
962 and annotation. *Bioinformatics.* 2006/10/20 ed. 2007;23(1):127–8.
- 963 35. Moissl-Eichinger C. Archaea in artificial environments: their presence in global spacecraft  
964 clean rooms and impact on planetary protection. *ISME J [Internet].* 2011;5(2):209–19.
- 965 36. Caporaso JG, Lauber CL, Walters WA, Berg-Lyons D, Huntley J, Fierer N, et al. Ultra-high-  
966 throughput microbial community analysis on the Illumina HiSeq and MiSeq platforms. *ISME J.*  
967 2012;6(8):1621–4.
- 968 37. Probst AJ, Auerbach AK, Moissl-Eichinger C. Archaea on human skin. *PLoS One.*  
969 2013;8(6):e65388.
- 970 38. Raskin L, Stromley JM, Rittmann BE, Stahl DA. Group-specific 16S rRNA hybridization probes to  
971 describe natural communities of methanogens. *Appl Environ Microbiol.* 1994 Apr;60(4):1232–  
972 40.
- 973 39. Stahl DA, Amann R. Development and Application of Nucleic Acid Probes in Bacterial  
974 Systematics. In: Stackebrandt E, Goodfellow M, editors. *Nucleic Acid Techniques in Bacterial*  
975 *Systematics.* 1991. p. 205–48.
- 976 40. Klindworth A, Pruesse E, Schweer T, Peplies J, Quast C, Horn M, et al. Evaluation of general  
977 16S ribosomal RNA gene PCR primers for classical and next-generation sequencing-based  
978 diversity studies. *Nucleic Acids Res.* 2012;gks808.
- 979 41. Mora M, Perras A, Alekhova TA, Wink L, Krause R, Aleksandrova A, et al. Resilient  
980 microorganisms in dust samples of the International Space Station—survival of the adaptation  
981 specialists. *Microbiome.* 2016;4(1).
- 982 42. Andrews S. FastQC: a quality control tool for high throughput sequence data. 2010.
- 983 43. Bolger AM, Lohse M, Usadel B. Trimmomatic: A flexible trimmer for Illumina sequence data.

- 984            Bioinformatics. 2014;30(15):2114–20.
- 985    44.    Bankevich A, Nurk S, Antipov D, Gurevich AA, Dvorkin M, Kulikov AS, et al. SPAdes: A New  
986            Genome Assembly Algorithm and Its Applications to Single-Cell Sequencing. *J Comput Biol.*  
987            2012;19(5):455–77.
- 988    45.    Parks DH, Imelfort M, Skennerton CT, Hugenholtz P, Tyson GW. CheckM: assessing the quality  
989            of microbial genomes recovered from. *Cold Spring Harb Lab Press Method.* 2015;1:1–31.
- 990    46.    Vallenet D, Calteau A, Cruveiller S, Gachet M, Lajus A, Josso A, et al. MicroScope in 2017: An  
991            expanding and evolving integrated resource for community expertise of microbial genomes.  
992            *Nucleic Acids Res.* 2017;45(D1):D517–28.
- 993    47.    Vallenet D, Labarre L, Rouy Z, Barbe V, Bocs S, Cruveiller S, et al. MaGe: A microbial genome  
994            annotation system supported by synteny results. *Nucleic Acids Res.* 2006;34(1):53–65.
- 995    48.    Vallenet D, Engelen S, Mornico D, Cruveiller S, Fleury L, Lajus A, et al. MicroScope: A platform  
996            for microbial genome annotation and comparative genomics. *Database.* 2009;2009:1–12.
- 997    49.    ECSS EC for SS. Microbial examination of flight hardware and cleanrooms ECSS-Q-ST-70-55C.  
998            2008;
- 999    50.    Eucast. PK/PD (Non-species related) breakpoints [Internet]. [cited 2016 Jul 1].
- 1000    51.    Callahan BJ, McMurdie PJ, Rosen MJ, Han AW, Johnson AJA, Holmes SP. DADA2: High-  
1001            resolution sample inference from Illumina amplicon data. *Nat Methods.* 2016;13:581–3.
- 1002    52.    Callahan BJ, Sankaran K, Fukuyama JA, McMurdie PJ, Holmes SP. Bioconductor workflow for  
1003            microbiome data analysis: from raw reads to community analyses. *F1000Research.* 2016;5.
- 1004    53.    Zakrzewski M, Proietti C, Ellis JJ, Hasan S, Brion M-J, Berger B, et al. Calypso: a user-friendly  
1005            web-server for mining and visualizing microbiome–environment interactions. *Bioinformatics.*  
1006            2016 Dec;btw725.
- 1007    54.    Aßhauer KP, Wemheuer B, Daniel R, Meinicke P. Tax4Fun: predicting functional profiles from  
1008            metagenomic 16S rRNA data. *Bioinformatics.* 2015;31(17):2882–4.
- 1009    55.    Caporaso JG, Kuczynski J, Stombaugh J, Bittinger K, Bushman FD, Costello EK, et al. QIIME  
1010            allows analysis of high-throughput community sequencing data. *Nat Methods.* 2010;7(5):335–  
1011            6.
- 1012    56.    Shannon P, Markiel A, Ozier O, Baliga NS, Wang JT, Ramage D, et al. Cytoscape: a software  
1013            environment for integrated models of biomolecular interaction networks. *Genome Res.*  
1014            2003;13(11):2498–504.
- 1015    57.    Thannesberger J, Hellinger H-J, Klymiuk I, Kastner M-T, Rieder FJJ, Schneider M, et al. Viruses  
1016            comprise an extensive pool of mobile genetic elements in eukaryote cell cultures and human  
1017            clinical samples. *FASEB J.* 2017;31(5):1987–2000.
- 1018    58.    Meyer F, Paarmann D, D’Souza M, Olson R, Glass EM, Kubal M, et al. The metagenomics RAST  
1019            server—a public resource for the automatic phylogenetic and functional analysis of  
1020            metagenomes. *BMC Bioinformatics.* 2008;9(1):386.
- 1021    59.    Bolyen E, Rideout JR, Dillon MR, Bokulich NA, Abnet C, Al-Ghalith GA, et al. QIIME 2:  
1022            Reproducible, interactive, scalable, and extensible microbiome data science. 2018.
- 1023    60.    Jacoby GA. AmpC beta-lactamases. *Clin Microbiol Rev.* 2009 Jan;22(1):161–82, Table of

- 1024 Contents.
- 1025 61. Mykytczuk NCS, Wilhelm RC, Whyte LG. *Planococcus halocryophilus* sp. nov., an extreme sub-  
1026 zero species from high Arctic permafrost. *Int J Syst Evol Microbiol.* 2012;62(Pt 8):1937–44.
- 1027 62. Yamaguchi N, Ichijo T, Nasu M. Bacterial Monitoring in the International Space Station-  
1028 “Kibo” Based on rRNA Gene Sequence. *Trans JAPAN Soc Aeronaut Sp Sci Aerosp*  
1029 *Technol JAPAN.* 2016;14(ists30):Pp\_1 – Pp\_4.
- 1030 63. Sakai T, Moteki Y, Takahashi T, Shida K, Kiwaki M, Shimakawa Y, et al. Probiotics into outer  
1031 space: feasibility assessments of encapsulated freeze-dried probiotics during 1 month’s  
1032 storage on the International Space Station. *Sci Rep.* 2018;8(1):10687.
- 1033 64. Pierson DL. Microbial contamination of spacecraft. *Gravit Sp Biol Bull.* 2001;14:1–6.
- 1034 65. Mord ISS. SSP 50260: ISS medical operations requirement document. Houston. 2009;307:22.
- 1035 66. Lax S, Sangwan N, Smith D, Larsen P, Handley KM, Richardson M, et al. Bacterial colonization  
1036 and succession in a newly opened hospital. *Sci Transl Med.* 2017;9(391):eaah6500.
- 1037 67. Staley JT, Irgens RL, Brenner DJ. *Enhydrobacter aerosaccus* gen. nov., sp. nov., a gas-  
1038 vacuolated, facultatively anaerobic, heterotrophic rod. *Int J Syst Evol Microbiol.*  
1039 1987;37(3):289–91.
- 1040 68. Singh NK, Bezdán D, Sielaff AC, Wheeler K, Mason CE, Venkateswaran K. Multi-drug resistant  
1041 *Enterobacter bugandensis* species isolated from the International Space Station and  
1042 comparative genomic analyses with human pathogenic strains. *BMC Microbiol.*  
1043 2018;18(1):175.
- 1044 69. Ruiz-Calderon JF, Cavallin H, Song SJ, Novoselac A, Pericchi LR, Hernandez JN, et al. Walls talk:  
1045 Microbial biogeography of homes spanning urbanization. *Sci Adv.* 2016;2(2):e1501061.
- 1046 70. Moissl-Eichinger C, Probst AJ, Birarda G, Auerbach A, Koskinen K, Wolf P, et al. Human age and  
1047 skin physiology shape diversity and abundance of Archaea on skin. *Sci Rep.* 2017;7 (1):4039.
- 1048 71. Koskinen K, Pausan MR, Perras AK, Beck M, Bang C, Mora M, et al. First insights into the  
1049 diverse human archaeome: Specific detection of Archaea in the gastrointestinal tract, lung,  
1050 and nose and on skin. *MBio.* 2017;8(6).
- 1051 72. Pausan MR, Csorba C, Singer G, Till H, Schoepf V, Santigli E, et al. Measuring the archaeome:  
1052 detection and quantification of archaea signatures in the human body. *bioRxiv [Internet].*  
1053 2018 Jan 1;
- 1054 73. Alekhova TA, Zagustina NA, Aleksandrova A V, Novozhilova TY, Borisov A V, Plotnikov AD.  
1055 Monitoring of initial stages of the biodamage of construction materials used in aerospace  
1056 equipment using electron microscopy. *J Surf Investig X-ray, Synchrotron Neutron Tech.*  
1057 2007;1(4):411–6.
- 1058 74. Alekhova TA, Shklover VY, Zagustina NA, Shvyndina N V, Plotnikov AD, Vasil’ev AL. Electron  
1059 microscopy investigation of AlMg6 aluminum alloy surface defects caused by microorganisms  
1060 extracted in space stations. *J Surf Investig X-ray, Synchrotron Neutron Tech.* 2010;4(5):747–  
1061 53.
- 1062 75. Alekhova TA, Aleksandrova A V, Novozhilova TY, Lysak L V, Zagustina NA. The experiment  
1063 “initial stages of biological damage and deterioration in space.” *Moscow Univ Biol Sci Bull.*  
1064 2008;63(4):163–9.

- 1065 76. Baxi SN, Portnoy JM, Larenas-Linnemann D, Phipatanakul W, Barnes C, Baxi S, et al. Exposure  
1066 and health effects of fungi on humans. *J Allergy Clin Immunol Pract.* 2016;4(3):396–404.
- 1067 77. Blachowicz A, Chiang AJ, Romsdahl J, Kalkum M, Wang CCC, Venkateswaran K. Proteomic  
1068 characterization of *Aspergillus fumigatus* isolated from air and surfaces of the International  
1069 Space Station. *Fungal Genet Biol.* 2019;
- 1070 78. Satoh K, Yamazaki T, Nakayama T, Umeda Y, Alshahni MM, Makimura M, et al.  
1071 Characterization of fungi isolated from the equipment used in the International Space Station  
1072 or Space Shuttle. *Microbiol Immunol.* 2016;60(5):295–302.
- 1073
